# Supplementary material
Source: PubMed Central journal article supplement (PMC5198774)
Supplement: NIHMS806875-supplement-Supp_Table_S1-S7.pdf [file NIHMS806875-supplement-Supp_Table_S1-S7.pdf]

**Supplementary Table 1. Summary of GWAS studies included in the telomere structure and maintenance genes meta-analysis**

| Consortium         | Study Name                                                                | Study Acronym          | Location               | Study Design                                            | Case (N) | Control (N) | Genotyping platform                |
|--------------------|---------------------------------------------------------------------------|------------------------|------------------------|---------------------------------------------------------|----------|-------------|------------------------------------|
| <b>Colorectal-</b> | Association Study Evaluating RISK for Sporadic Colorectal Cancer          | ASTERISK               | France                 | Hospital Case-Control                                   | 948      | 947         | Illumina 300K                      |
| <b>GECCO</b>       | Darmkrebs: Chancen der Verhütung durch Screening                          | DACHS                  | Germany                | Population Case-Control                                 | 2376     | 2206        | Illumina 300K, 730K                |
|                    | Diet, Activity and Lifestyle Study                                        | DALS                   | USA                    | Population Case-Control                                 | 1116     | 1174        | Illumina 300K, 550K, 610K          |
|                    | Health Professionals Follow-up Study                                      | HPFS                   | USA                    | Cohort                                                  | 403      | 402         | Illumina 730K                      |
|                    | Nurses' Health Study                                                      | NHS                    | USA                    | Cohort                                                  | 553      | 955         | Illumina 730K                      |
|                    | Ontario Familial Colorectal Cancer Registry                               | OFCCR                  | Canada                 | Population Case-Control                                 | 650      | 522         | Affymetrix 100K, 500K              |
|                    | Physicians' Health Study                                                  | PHS                    | USA                    | Cohort                                                  | 382      | 389         | Illumina 730K                      |
|                    | Postmenopausal Hormone Study                                              | PMH                    | USA                    | Population Case-Control                                 | 280      | 122         | Illumina 300K                      |
|                    | Prostate, Lung, Colorectal and Ovarian Cancer Screening Trial             | PLCO                   | USA                    | Cohort                                                  | 1019     | 2391        | Illumina 300K/240S, 300K, 610K     |
|                    | VITamins And Lifestyle                                                    | VITAL                  | USA                    | Cohort                                                  | 285      | 288         | Illumina 300K                      |
|                    | Women's Health Initiative                                                 | WHI                    | USA                    | Cohort                                                  | 1476     | 2538        | Illumina 300K, 550K, 550Kduo, 610K |
|                    | Health Professionals Follow-up Study, Adenoma Set                         | HPFS Ad                | USA                    | Cohort                                                  | 313      | 345         | Illumina 730K                      |
|                    | Nurses' Health Study, Adenoma Set                                         | NHS Ad                 | USA                    | Cohort                                                  | 513      | 578         | Illumina 730K                      |
| <b>Colorectal-</b> | Molecular Epidemiology of Colorectal Cancer Study                         | MECC                   | USA                    | Population Case-Control                                 | 1120     | 820         | Affymetrix Axiom                   |
| <b>CORECT</b>      | Colorectal Cancer Family Registry                                         | CCFR                   | USA                    | Cohort                                                  | 1660     | 1393        | Affymetrix Axiom                   |
|                    | Kentucky Study                                                            | KY                     | USA                    | Population Case-Control                                 | 1038     | 1134        | Affymetrix Axiom                   |
|                    | American Cancer Society Cancer Prevention Study II                        | ACS/CPS-II             | USA                    | Cohort                                                  | 548      | 538         | Affymetrix Axiom                   |
|                    | Melbourne Case-Control Study                                              | Melbourne              | Australia              | Nested Case-Control (in Melbourne Collaborative Cohort) | 539      | 469         | Affymetrix Axiom                   |
|                    | Newfoundland Case-Control Study                                           | NF                     | Newfoundland           | Population Case-Control                                 | 195      | 477         | Affymetrix Axiom                   |
| <b>Breast-</b>     | Australian Breast Cancer Family Study                                     | ABCFS <sup>a</sup>     | Australia              | Population Case-Control                                 | 282      | 285         | Illumina 610K                      |
| <b>DRIVE</b>       | Dutch Familial Bilateral Breast Cancer Study                              | DFBBS <sup>a</sup>     | Netherlands            | Hospital Case-Control                                   | 464      | 3255        | Illumina 550K, 610K                |
|                    | Helsinki Breast Cancer Study                                              | HEBCS <sup>a</sup>     | Finland                | Hospital Case-Control (plus additional familial cases)  | 726      | 1012        | Illumina 370K, 550K, 610K          |
|                    | British Breast Cancer Study                                               | BBCS <sup>a</sup>      | United Kingdom         | Population, Familial Case-Control                       | 1609     | 1224        | Illumina 370K, 1.2M                |
|                    | German Consortium for Hereditary Breast and Ovarian Cancer                | GC-HBOC <sup>a</sup>   | Germany                | Population Case-Control                                 | 634      | 477         | Affymetrix GeneChip 5.0K, 6.0K     |
|                    | UK Familial Breast Cancer Study                                           | UK2 <sup>a</sup>       | United Kingdom         | Population Case-Control                                 | 3628     | 2663        | Illumina 670K, 1.2M                |
|                    | Singapore and Sweden Breast Cancer Study                                  | SASBAC <sup>a</sup>    | Sweden                 | Population Case-Control                                 | 790      | 756         | Illumina 240K, 317K, 550K          |
|                    | Mammary Carcinoma Risk Factor Investigation                               | MARIE <sup>a</sup>     | Germany                | Population Case-Control                                 | 652      | 470         | Illumina 370K, 550K                |
|                    | Breast and Prostate Cancer Cohort Consortium                              | BPC3 <sup>b</sup>      | USA, Europe            | Cohort, Population Case-Control                         | 1998     | 2305        | Illumina 550K, 610K, 660K          |
|                    | Breast Cancer Family Registry                                             | BCFR                   | USA, Australia         | Cohort                                                  | 3486     | 2457        | Illumina 610K + Cyto 12            |
|                    | Triple Negative Breast Cancer Consortium                                  | TN-GWAS <sup>c</sup>   | USA, Europe, Australia | Cohort, Mixed Case-Control                              | 1479     | 3180        | Illumina 370K, 550K, 660K 1.2M     |
| <b>Prostate-</b>   | Breast and Prostate Cancer Cohort Consortium                              | BPC3 <sup>d</sup>      | USA                    | Cohort                                                  | 2068     | 3011        | Illumina 610K                      |
| <b>ELLIPSE</b>     | United Kingdom Genome Wide Association Study 1                            | UKGWAS1                | United Kingdom         | Case-Control                                            | 1854     | 1894        | Illumina 550K                      |
|                    | United Kingdom Genome Wide Association Study 2                            | UKGWAS2                | United Kingdom         | Case-Control                                            | 3706     | 3884        | Illumina iSELECT                   |
|                    | Prostate Cancer Genetic Association Study of Uncommon Susceptibility Loci | PEGASUS                | USA                    | Nested Case-Control (in PLCO)                           | 4600     | 2941        | Illumina 2.5M                      |
|                    | Cancer of Prostate in Sweden Study 1                                      | CAPS1                  | Sweden                 | Population Case-Control                                 | 474      | 482         | Affymetrix GeneChip 5.0K           |
|                    | Cancer of Prostate in Sweden Study 2                                      | CAPS2                  | Sweden                 | Population Case-Control                                 | 1458     | 512         | Affymetrix GeneChip 5.0K           |
| <b>Ovarian-</b>    | United Kingdom Genome Wide Association Study (1 and 2)                    | UKGWAS <sup>e</sup>    | United Kingdom         | Mixed Case-Control                                      | 1763     | 6118        | Illumina 670K                      |
| <b>FOCI</b>        | United States Genome Wide Association Study                               | USGWAS <sup>f</sup>    | USA, Canada, Poland    | Mixed Case-Control                                      | 2165     | 2564        | Illumina 317K, 370K, 550K, 610K    |
|                    | Mayo Clinic Ovarian Cancer Study                                          | MAYO                   | USA                    | Clinic-Based                                            | 441      | 441         | Illumina 2.5M                      |
| <b>Lung-</b>       | MD Anderson Cancer Center Lung Cancer Study                               | MDACC                  | Texas USA              | Hospital Case-Control                                   | 1150     | 1134        | Illumina 317K                      |
| <b>TRICL</b>       | Institute for Cancer Research Lung Cancer Study                           | ICR                    | United Kingdom         | Hospital Case-Control                                   | 1952     | 5200        | Illumina 550K, 1.2M                |
|                    | Toronto/Samuel Lunenfeld Research Institute Study                         | Toronto/SLRI           | Toronto                | Hospital Case-Control                                   | 331      | 499         | Illumina 317K                      |
|                    | International Agency for Research on Cancer Genome Wide Association Study | IARC-GWAS <sup>g</sup> | Europe, USA            | Cohort, Mixed Case-Control                              | 2533     | 3791        | Illumina 317K, 370Kduo             |
|                    | Helmholtz-Gemeinschaft Deutscher Forschungszentren Lung Cancer Study      | HGF                    | Germany                | Population Case-Control                                 | 481      | 478         | Illumina 550K                      |
|                    | National Cancer Institute Lung Cancer Genome Wide Association Study       | NCI-GWAS <sup>h</sup>  | USA, Europe            | Population Case-Control, Cohort                         | 5713     | 5736        | Illumina 550K, 610Kduo             |

Abbreviations: CORECT- ColoRectal Transdisciplinary Study; DRIVE- Discovery, Biology, and Risk of Inherited Variants in Breast Cancer; ELLIPSE- Elucidating Loci Involved in Prostate Cancer Susceptibility; FOCI- Follow-up of Ovarian Cancer Genetic Association and Interaction Studies; N- number; ref- reference; TRICL- Transdisciplinary Research in Cancer of the Lung.

<sup>a</sup> These studies are apart of the Breast Cancer Association Consortium Combined GWAS (C-BCAC)

<sup>b</sup> Includes the following studies: CPS-II, European Prospective Investigation into Cancer and Nutrition (EPIC; Europe), MEC, Multiethnic Cohort (MEC; USA), NHS (subset), NHS II, PLCO and Polish Breast Cancer Study (PBCS; Poland).

<sup>c</sup> Includes the following studies: Australian Breast Cancer Tissue Bank (ABCTB; Australia), Bavarian Breast Cancer Cases and Controls (BBCC; Germany), Cancer Genetic Markers of Susceptibility (CGEMS; USA), Harvard Breast Cancer SPORE Blood Repository (DFCI; USA), Fox Chase Cancer Center (FCCC; USA), Gene Environment Interaction and Breast Cancer in Germany (GENICA; Germany), HEBCS, Cooperative Health Research in the Region of Augsburg (KORA; Germany), MARIE, Mayo Clinic Breast Cancer Study (MCBCS; USA), Melbourne Collaborative Cohort Study (MCCS; Australia), Prospective Study of Outcomes in Sporadic Versus Hereditary Breast Cancer (POSH; United Kingdom); Australian Twin Cohort Study from the Queensland Institute of Medical Research (QIMR; Australia), Sheffield Breast Cancer Study (SBCS; United Kingdom) and Welcome Trust Case Control Consortium (WTCC; United Kingdom).

<sup>d</sup> Includes the following studies: Alpha-Tocopherol, Beta-Carotene Cancer Prevention Study (ATBC; Finland), CPS-II, EPIC, HPFS, MEC and PHS.

<sup>e</sup> Includes the following studies: United Kingdom Ovarian Cancer Population Study (UKO; United Kingdom), United Kingdom Familial Ovarian Cancer Registry (UKR; United Kingdom), Royal Marsden Hospital Ovarian Cancer Study (RMH; United Kingdom), Study of Epidemiology and Risk Factors in Cancer Heredity (SEA; United Kingdom) and WTCC.

<sup>f</sup> Includes the following studies: Brigham Woman's Hospital Study (BWH; USA), Mayo Clinic Ovarian Cancer Study (MAY; USA), North Carolina Ovarian Cancer Study (NCO; USA), Polish Ovarian Cancer Study (POL; Poland), Tampa Bay Moffitt Ovarian Cancer Study (TBO; USA) and Toronto Familial Ovarian Tumor Study (TOR; Canada).

<sup>a</sup> Includes the following studies: Carotene and Retinol Efficacy Trial Cohort (CARET; USA), Central European Multicenter Hospital-Based Case-Control Cancer Study (Europe), Estonia Hospital-Based Case-Control Lung Cancer Study (Estonia), the Hospital-Based Case-Control Study in France (France), and the population-based North Trondelag Health Study 2/Tromsø IV (HUNT2/Tromsø; Norway).

<sup>b</sup> Includes the following studies: ATBC, CPS-II, Environmental And Genetics in Lung Cancer Etiology Study (EAGLE; Italy), and PLCO.

Supplementary Table 2. Information on genotyping methods, quality control, and imputation by consortium

| Cancer-<br>CONSORTIUM | Sample QC                                        |                                                                                    | Genotyping Inclusion                                                              |                                                                             |                                                                                                  |                                                                                                                                                             | Imputation                                                      |                                                                                                             |
|-----------------------|--------------------------------------------------|------------------------------------------------------------------------------------|-----------------------------------------------------------------------------------|-----------------------------------------------------------------------------|--------------------------------------------------------------------------------------------------|-------------------------------------------------------------------------------------------------------------------------------------------------------------|-----------------------------------------------------------------|-------------------------------------------------------------------------------------------------------------|
|                       | Call Rate for Inclusion                          | Exclusions                                                                         | Genotyping Platform                                                               | SNP Call Rate                                                               | MAF                                                                                              | P-value for HWE                                                                                                                                             | Software                                                        | SNP Inclusion Criteria                                                                                      |
| Colorectal-GECCO      | ≥98%                                             | a-d, f                                                                             | Illumina 300/240S, 300K, 550K, 610K, 730K; Affymetrix 100K, 500K                  | ≥98%                                                                        | ≥0.10 or ≥0.05 (PLCO, WHI, DAL5, OFCCR)                                                          | >1x10 <sup>-4</sup> in controls                                                                                                                             | Minimac                                                         | r <sup>2</sup> >0.3 if MAF >0.01, r <sup>2</sup> ≥0.5 if MAF 0.005-0.01, r <sup>2</sup> ≥0.99 if MAF <0.005 |
| Colorectal-CORECT     | ≥95%                                             | a, b, d, f                                                                         | Affymetrix Axiom                                                                  | ≥95%                                                                        | ≥0.01                                                                                            | >1x10 <sup>-4</sup> in controls                                                                                                                             | IMPUTE2.0                                                       | Info >0.7, certainty >0.9, concordance >0.9                                                                 |
| Breast- DRIVE         | ≥95% (BPC3, BCAC), ≥98% (TN-GWAS)                | a (TNGWAS, BPC3), b, c (BCAC, BPC3), d (TNGWAS, BPC3), g (BCAC, BPC3)              | Illumina 240K/317K/370K/550K/610K/610K +Cyto12/660K/670K/1.2M; Affymetrix 5.0/6.0 | ≥95% or ≥99% and MAF ≥0.05 (BCAC), ≥95% or MAF ≥0.05% (TNGWAS), ≥95% (BPC3) | ≥0.01 or >0.05 and ≥99% SNP call rate (BCAC), ≥0.05 or ≥95% SNP call rate (TNGWAS), ≥0.05 (BPC3) | ≥1x10 <sup>-6</sup> in controls and ≥1x10 <sup>-12</sup> in cases (BCAC), >1x10 <sup>-7</sup> in controls (TN-GWAS); ≥1x10 <sup>-5</sup> in controls (BPC3) | MACH1.0                                                         | r <sup>2</sup> >0.3                                                                                         |
| Prostate- ELLIPSE     | ≥94% (Pegasus), ≥95% (CAPS, BPC3), ≥97% (UKGWAS) | a (UKGWAS, CAPS), b, c (except Pegasus), d (except BPC3), e (except Pegasus), g, h | Illumina 550K/610K/2.5M/iSELECT; Affymetrix GeneChip 5.0                          | >90% (Pegasus), >95% (UKGWAS, CAPS, BPC3)                                   | ≥0.001 (Pegasus), ≥0.01 (UKGWAS, CAPS, BPC3)                                                     | ≥1x10 <sup>-5</sup> (UKGWAS, BPC3), ≥1x10 <sup>-6</sup> (CAPS, Pegasus)                                                                                     | IMPUTE2.0 (UKGWAS, CAPS, Pegasus), Minimac (BPC3, some Pegasus) | Info >0.3 (IMPUTE2.0), r <sup>2</sup> ≥0.3 (Minimac)                                                        |
| Ovarian- FOCI         | ≥95% (USGWAS)                                    | a-d, g, i                                                                          | Illumina 317K/370K/550K/610K/670K/2.5M                                            | ≥95% and MAF ≤0.05 or ≥99% and MAF ≥0.05                                    | ≥0.03                                                                                            | ≥1x10 <sup>-7</sup>                                                                                                                                         | MACH1.0 (USGWAS), IMPUTE and fastPHASE (UKGWAS)                 | r <sup>2</sup> >0.3                                                                                         |
| Lung- TRICL           | Average ≥90%                                     | a-d, j                                                                             | Illumina 317K/370K/550K/610K                                                      | ≥95% <sup>k</sup>                                                           | n/a <sup>l</sup>                                                                                 | ≥1x10 <sup>-6</sup> (ICR, SLRI) <sup>k</sup> , ≥1x10 <sup>-7</sup> (IARC, NCI) <sup>k</sup>                                                                 | IMPUTE2.0 (ICR, SLRI, NCI), MACH1.0 (MDACC), Minimac (IARC)     | Info >0.3 (IMPUTE2.0), r <sup>2</sup> ≥0.3 (MACH1.0, Minimac)                                               |

Abbreviations: HWE- Hardy-Weinberg equilibrium; Info- information score; MAF, minor allele frequency; n/a- not applicable; PC- principal components; QC- quality control; SNP- single nucleotide polymorphism

Sample QC exclusions included: <sup>a</sup> sex discordance, mismatch or ambiguous; <sup>b</sup> Non-European ancestry; <sup>c</sup> heterozygosity; <sup>d</sup> unexpected or false duplicates; <sup>e</sup> cryptic duplicates; <sup>f</sup> low or unanticipated genotype concordance; <sup>g</sup> related samples; <sup>h</sup> ancestry outliers; <sup>i</sup> conversion rate <95%; <sup>j</sup> outliers based on PC.

<sup>k</sup> No additional quality control before imputation was performed for MDACC

<sup>l</sup> Criteria for SLRI study only MAF < 1x10<sup>-6</sup>

**Supplementary Table 3. Telomere structure and maintenance genes included in analysis**

| Gene                        | Name                                                              | Chromosomal Location | Region <sup>a</sup>              | Alias                                                          | Number of SNPs Examined | Effective Number of Independent Tests ( $M_e$ ) <sup>b</sup> | Significance Level <sup>c</sup> |
|-----------------------------|-------------------------------------------------------------------|----------------------|----------------------------------|----------------------------------------------------------------|-------------------------|--------------------------------------------------------------|---------------------------------|
| <i>DCLRE1B</i>              | DNA cross-link repair 1B                                          | 1p13.2               | 114447915..114456708             | APOLLO, SNM1B, SNM1B                                           | 6,603                   | 1,889                                                        | 2.65E-05                        |
| <i>ACYP2</i>                | acylphosphatase 2, muscle type                                    | 2p16.2               | 54342410..54532435               | ACYM, ACYP                                                     | 10,630                  | 3,126                                                        | 1.60E-05                        |
| <i>TERC</i>                 | telomerase RNA component                                          | 3q26                 | 169482398..169482848, complement | DKCA1, PFBMFT2, SCARNA19, TR, TRC3, hTR                        | 7,523                   | 2,038                                                        | 2.45E-05                        |
| <i>GAR1</i>                 | GAR1 ribonucleoprotein                                            | 4q25                 | 110737309..110745893             | NOLA1                                                          | 7,851                   | 2,053                                                        | 2.44E-05                        |
| <i>NAF1</i>                 | nuclear assembly factor 1 ribonucleoprotein                       | 4q32.2               | 164047860..164088073, complement | ---                                                            | 9,215                   | 2,183                                                        | 2.29E-05                        |
| <i>TERT</i> <sup>d</sup>    | telomerase reverse transcriptase                                  | 5p15.33              | 1253282..1295178, complement     | CMM9, DKCA2, DKCB4, EST2, PFBMFT1, TCS1, TP2, TRT, hEST2, hTRT | 12,109 <sup>d</sup>     | 3,790                                                        | 1.32E-05                        |
| <i>CLPTMIL</i> <sup>d</sup> | CLPTM1-like                                                       | 5p15.33              | 1317869..1345180, complement     | ---                                                            | 12,109 <sup>d</sup>     | 3,790                                                        | 1.32E-05                        |
| <i>NHP2</i>                 | NHP2 ribonucleoprotein                                            | 5q35.3               | 177576465..177580961, complement | DKCB2, NHP2, NOLA2                                             | 8,760                   | 2,453                                                        | 2.04E-05                        |
| <i>POT1</i>                 | protection of telomeres 1                                         | 7q31.33              | 124462440..124569856, complement | CMM10, HPOT1                                                   | 8,718                   | 1,702                                                        | 2.94E-05                        |
| <i>TERF1</i>                | telomeric repeat binding factor (NIMA-interacting) 1              | 8q21.11              | 73921097..73959987               | PIN2, TRBF1, TRF, TRF1, hTRF1-AS, t-TRF1                       | 8,368                   | 2,364                                                        | 2.12E-05                        |
| <i>PINX1</i> <sup>e</sup>   | PIN2/TERF1 interacting, telomerase inhibitor 1                    | 8p23                 | 10622884..10697299, complement   | LPTL, LPTS                                                     | 19,977 <sup>e</sup>     | 6,012                                                        | 8.32E-06                        |
| <i>TNKS</i> <sup>e</sup>    | tankyrase, TRF1-interacting ankyrin-related ADP-ribose polymerase | 8p23.1               | 9432558..9639856                 | ARTD5, PARP-5a, PARP5A, PARPL, TIN1, TINF11, pART5             | 19,977 <sup>e</sup>     | 6,012                                                        | 8.32E-06                        |

|                 |                                                           |               |                                  |                                         |        |       |          |
|-----------------|-----------------------------------------------------------|---------------|----------------------------------|-----------------------------------------|--------|-------|----------|
| <i>OBFC1</i>    | oligonucleotide/oligosaccharide-binding fold containing 1 | 10q24.33      | 105637318..105678045, complement | AAF-44, AAF44, bA541N10.2, RPA-32, STN1 | 7,064  | 1,917 | 2.61E-05 |
| <i>BICD1</i>    | bicaudal D homolog 1                                      | 12p11.2-p11.1 | 32260185..32531141               | BICD                                    | 12,000 | 2,752 | 1.82E-05 |
| <i>TEP1</i>     | telomerase-associated protein 1                           | 14q11.2       | 20839648..20850515, complement   | TLP1, TP1, TROVE1, VAULT2, p240         | 8,541  | 2,834 | 1.76E-05 |
| <i>TINF2</i>    | TERF1 (TRF1)-interacting nuclear factor 2                 | 14q12         | 24708851..24711880, complement   | DKCA3, TIN2                             | 8,283  | 2,337 | 2.14E-05 |
| <i>NOP10</i>    | NOP10 ribonucleoprotein                                   | 15q14-q15     | 34633917..34635362, complement   | DKCB1, NOLA3, NOP10P                    | 9,202  | 2,557 | 1.96E-05 |
| <i>ACD</i>      | adrenocortical dysplasia homolog                          | 16q22.1       | 67691889..67694718, complement   | PIP1, PTOP, TINT1, TPP1                 | 5,132  | 2,529 | 1.98E-05 |
| <i>TERF2</i>    | telomeric repeat binding factor 2                         | 16q22.1       | 69404112..69419891, complement   | TRBF2, TRF2                             | 5,610  | 1,622 | 3.08E-05 |
| <i>TERF2IP</i>  | telomeric repeat binding factor 2, interacting protein    | 16q23.1       | 75681635..75691341               | DRIP5, RAP1                             | 9,355  | 2,672 | 1.87E-05 |
| <i>MPHOSPH6</i> | M-phase phosphoprotein 6                                  | 16q23.3       | 82181767..82203829, complement   | MPP, MPP-6, MPP6                        | 14,049 | 4,660 | 1.07E-05 |
| <i>PIK3C3</i>   | phosphatidylinositol 3-kinase, catalytic subunit type 3   | 18q12.3       | 39535199..39661446               | VPS34, hVps34                           | 8,059  | 1,992 | 2.51E-05 |
| <i>ZNF208</i>   | zinc finger protein 208                                   | 19p12         | 22148897..22193745, complement   | PMIDP, ZNF95                            | 9,567  | 1,675 | 2.99E-05 |
| <i>RTEL1</i>    | regulator of telomere elongation helicase 1               | 20q13.3       | 62289163..62328544               | C20orf41, DKCA4, DKCB5, NHL, RTEL       | 8,377  | 2,681 | 1.86E-05 |

<sup>a</sup>SNPs one mega-base upstream and downstream of the listed regions were examined.

<sup>b</sup>The effective number of independent tests ( $M_e$ ) is calculated for each gene using the Genetic type 1 Error Calculator (GEC) developed by Li et al.

<sup>c</sup>For each gene the P-value threshold required to keep type I error at 5% was calculated by dividing alpha by  $M_e$ .

<sup>d</sup>Genes *TERT* and *CLPTMIL* are examined together.

<sup>e</sup>Genes *TNKS* and *PINX1* are examined together.

Supplementary Table 4. Overlapping cases and controls across the different cancer types and subtypes

| Cancer Type<br>Subtype | Colorectal |        | Breast |             | Prostate |            | Ovarian |              |        | Lung  |                |          |
|------------------------|------------|--------|--------|-------------|----------|------------|---------|--------------|--------|-------|----------------|----------|
|                        | GECCO      | CORECT | All    | ER-negative | All      | Aggressive | All     | Endometrioid | Serous | All   | Adenocarcinoma | Squamous |
| <b>CASES</b>           |            |        |        |             |          |            |         |              |        |       |                |          |
| Colorectal (GECCO)     | 10314      | 0      | 0      | 0           | 0        | 0          | 0       | 0            | 0      | 0     | 0              | 0        |
| Colorectal (CORECT)    | 0          | 5100   | 0      | 0           | 0        | 0          | 0       | 0            | 0      | 0     | 0              | 0        |
| Breast                 | 0          | 0      | 15748  | 4939        | 0        | 0          | 0       | 0            | 0      | 0     | 0              | 0        |
| Breast ER-negative     | 0          | 0      | 4939   | 4939        | 0        | 0          | 0       | 0            | 0      | 0     | 0              | 0        |
| Prostate               | 0          | 0      | 0      | 0           | 14160    | 4450       | 0       | 0            | 0      | 0     | 0              | 0        |
| Prostate Aggressive    | 0          | 0      | 0      | 0           | 4450     | 4450       | 0       | 0            | 0      | 0     | 0              | 0        |
| Ovarian                | 0          | 0      | 0      | 0           | 0        | 0          | 4369    | 715          | 2556   | 0     | 0              | 0        |
| Ovarian Endometrioid   | 0          | 0      | 0      | 0           | 0        | 0          | 715     | 715          | 0      | 0     | 0              | 0        |
| Ovarian Serous         | 0          | 0      | 0      | 0           | 0        | 0          | 2556    | 0            | 2556   | 0     | 0              | 0        |
| Lung                   | 0          | 0      | 0      | 0           | 0        | 0          | 0       | 0            | 0      | 12160 | 3718           | 3422     |
| Lung Adenocarcinoma    | 0          | 0      | 0      | 0           | 0        | 0          | 0       | 0            | 0      | 3718  | 3718           | 0        |
| Lung Squamous          | 0          | 0      | 0      | 0           | 0        | 0          | 0       | 0            | 0      | 3422  | 0              | 3422     |
| <b>CONTROLS</b>        |            |        |        |             |          |            |         |              |        |       |                |          |
| Colorectal (GECCO)     | 12857      | 0      | 0      | 0           | 1101     | 1101       | 0       | 0            | 0      | 1817  | 1817           | 1817     |
| Colorectal (CORECT)    | 0          | 4831   | 0      | 0           | 0        | 0          | 0       | 0            | 0      | 0     | 0              | 0        |
| Breast                 | 0          | 0      | 18084  | 13128       | 0        | 0          | 2663    | 2663         | 2663   | 3003  | 3003           | 3003     |
| Breast ER-negative     | 0          | 0      | 13128  | 13128       | 0        | 0          | 2663    | 2663         | 2663   | 3003  | 3003           | 3003     |
| Prostate               | 1101       | 0      | 0      | 0           | 12724    | 12724      | 0       | 0            | 0      | 2000  | 2000           | 2000     |
| Prostate Aggressive    | 1101       | 0      | 0      | 0           | 12724    | 12724      | 0       | 0            | 0      | 2000  | 2000           | 2000     |
| Ovarian                | 0          | 0      | 2663   | 2663        | 0        | 0          | 9123    | 9123         | 9123   | 5200  | 5200           | 5200     |
| Ovarian Endometrioid   | 0          | 0      | 2663   | 2663        | 0        | 0          | 9123    | 9123         | 9123   | 5200  | 5200           | 5200     |
| Ovarian Serous         | 0          | 0      | 2663   | 2663        | 0        | 0          | 9123    | 9123         | 9123   | 5200  | 5200           | 5200     |
| Lung                   | 1817       | 0      | 3003   | 3003        | 2000     | 2000       | 5200    | 5200         | 5200   | 16838 | 15871          | 16015    |
| Lung Adenocarcinoma    | 1817       | 0      | 3003   | 3003        | 2000     | 2000       | 5200    | 5200         | 5200   | 15871 | 15871          | 15871    |
| Lung Squamous          | 1817       | 0      | 3003   | 3003        | 2000     | 2000       | 5200    | 5200         | 5200   | 16015 | 15871          | 16015    |

**Supplementary Table 5. Unconditional ASSET two-sided meta-analysis results across five cancer types for SNPs with P-values below gene-specific P-value thresholds**

| Gene (Chr.)             | SNP         | Position  | Ref.:Effect Alleles | Effect Allele Frequency | Combined P-value      | Positively Associated |         | Inversely Associated |                       | Cancer type           |                              |
|-------------------------|-------------|-----------|---------------------|-------------------------|-----------------------|-----------------------|---------|----------------------|-----------------------|-----------------------|------------------------------|
|                         |             |           |                     |                         |                       | OR (95% CI)           | P-value | OR (95% CI)          | P-value               | Positively Associated | Inversely Associated         |
| <i>DCLRE1B</i> (Chr. 1) |             |           |                     |                         |                       |                       |         |                      |                       |                       |                              |
|                         | rs7514649   | 114079822 | G : A               | 0.144                   | 1.67E-04              |                       |         | 0.92 (0.88-0.95)     | 1.66E-05 <sup>a</sup> |                       | Colorectal, Prostate         |
|                         | rs17461918  | 114081444 | A : G               | 0.143                   | 9.40E-05              |                       |         | 0.92 (0.88-0.95)     | 8.85E-06 <sup>a</sup> |                       | Colorectal, Prostate         |
|                         | rs17508449  | 114085145 | C : T               | 0.143                   | 1.03E-04              |                       |         | 0.92 (0.88-0.95)     | 9.66E-06 <sup>a</sup> |                       | Colorectal, Prostate         |
|                         | rs79381435  | 114085676 | G : A               | 0.145                   | 1.04E-04              |                       |         | 0.92 (0.88-0.95)     | 9.89E-06 <sup>a</sup> |                       | Colorectal, Prostate         |
|                         | rs4839327   | 114096499 | C : T               | 0.139                   | 8.84E-05              |                       |         | 0.91 (0.88-0.95)     | 8.53E-06 <sup>a</sup> |                       | Colorectal, Prostate         |
|                         | rs114207498 | 114104354 | C : A               | 0.140                   | 5.58E-05              |                       |         | 0.91 (0.88-0.95)     | 6.63E-06 <sup>a</sup> |                       | Colorectal, Prostate         |
|                         | rs75926636  | 114104765 | C : T               | 0.141                   | 9.59E-05              |                       |         | 0.92 (0.88-0.95)     | 1.22E-05 <sup>a</sup> |                       | Colorectal, Prostate         |
|                         | rs150091562 | 114113597 | C : T               | 0.135                   | 1.16E-04              |                       |         | 0.92 (0.88-0.95)     | 1.15E-05 <sup>a</sup> |                       | Colorectal, Prostate         |
|                         | rs75159321  | 114114947 | T : A               | 0.141                   | 1.12E-04              |                       |         | 0.92 (0.88-0.95)     | 1.37E-05 <sup>a</sup> |                       | Colorectal, Prostate         |
|                         | rs76752412  | 114115827 | G : A               | 0.140                   | 1.25E-04              |                       |         | 0.92 (0.88-0.95)     | 1.49E-05 <sup>a</sup> |                       | Colorectal, Prostate         |
|                         | rs147962667 | 114116029 | T : C               | 0.141                   | 1.35E-04              |                       |         | 0.92 (0.88-0.95)     | 1.68E-05 <sup>a</sup> |                       | Colorectal, Prostate         |
|                         | rs116480529 | 114116744 | C : A               | 0.141                   | 1.10E-04              |                       |         | 0.92 (0.88-0.95)     | 1.34E-05 <sup>a</sup> |                       | Colorectal, Prostate         |
|                         | rs113081027 | 114118802 | C : G               | 0.140                   | 4.41E-05              |                       |         | 0.91 (0.88-0.95)     | 5.00E-06 <sup>a</sup> |                       | Colorectal, Prostate         |
|                         | rs75419513  | 114132796 | A : T               | 0.139                   | 4.41E-05              |                       |         | 0.91 (0.88-0.95)     | 5.40E-06 <sup>a</sup> |                       | Colorectal, Prostate         |
|                         | rs4838993   | 114135133 | G : A               | 0.139                   | 3.98E-05              |                       |         | 0.91 (0.88-0.95)     | 4.83E-06 <sup>a</sup> |                       | Colorectal, Prostate         |
|                         | rs4839329   | 114135705 | G : A               | 0.139                   | 3.97E-05              |                       |         | 0.91 (0.88-0.95)     | 4.82E-06 <sup>a</sup> |                       | Colorectal, Prostate         |
|                         | rs4839330   | 114137582 | T : C               | 0.140                   | 7.34E-05              |                       |         | 0.92 (0.88-0.95)     | 9.08E-06 <sup>a</sup> |                       | Colorectal, Prostate         |
|                         | rs75296543  | 114138286 | C : A               | 0.140                   | 7.34E-05              |                       |         | 0.92 (0.88-0.95)     | 9.08E-06 <sup>a</sup> |                       | Colorectal, Prostate         |
|                         | rs147272614 | 114143966 | C : G               | 0.125                   | 7.59E-05              |                       |         | 0.91 (0.87-0.95)     | 9.14E-06 <sup>a</sup> |                       | Colorectal, Prostate         |
|                         | rs76308249  | 114147681 | A : G               | 0.139                   | 2.89E-05              |                       |         | 0.91 (0.88-0.95)     | 3.53E-06 <sup>a</sup> |                       | Colorectal, Prostate         |
|                         | rs78703286  | 114148115 | A : G               | 0.139                   | 3.06E-05              |                       |         | 0.91 (0.88-0.95)     | 3.76E-06 <sup>a</sup> |                       | Colorectal, Prostate         |
|                         | rs76112502  | 114149696 | T : C               | 0.139                   | 2.85E-05              |                       |         | 0.91 (0.88-0.95)     | 3.49E-06 <sup>a</sup> |                       | Colorectal, Prostate         |
|                         | rs80348557  | 114151116 | C : T               | 0.139                   | 2.82E-05              |                       |         | 0.91 (0.88-0.95)     | 3.45E-06 <sup>a</sup> |                       | Colorectal, Prostate         |
|                         | rs4838994   | 114151606 | G : A               | 0.139                   | 4.33E-05              |                       |         | 0.91 (0.88-0.95)     | 5.48E-06 <sup>a</sup> |                       | Colorectal, Prostate         |
|                         | rs111408799 | 114153375 | T : A               | 0.139                   | 3.00E-05              |                       |         | 0.91 (0.88-0.95)     | 3.68E-06 <sup>a</sup> |                       | Colorectal, Prostate         |
|                         | rs4839331   | 114161631 | A : G               | 0.140                   | 3.90E-05              |                       |         | 0.91 (0.88-0.95)     | 5.02E-06 <sup>a</sup> |                       | Colorectal, Prostate         |
|                         | rs4839332   | 114162191 | G : T               | 0.140                   | 3.30E-05              |                       |         | 0.91 (0.88-0.95)     | 4.11E-06 <sup>a</sup> |                       | Colorectal, Prostate         |
|                         | rs77892281  | 114163617 | A : T               | 0.140                   | 3.91E-05              |                       |         | 0.91 (0.88-0.95)     | 5.06E-06 <sup>a</sup> |                       | Colorectal, Prostate         |
|                         | rs192524208 | 114166133 | G : A               | 0.144                   | 6.08E-05              |                       |         | 0.93 (0.90-0.96)     | 8.31E-06 <sup>a</sup> |                       | Colorectal, Breast, Prostate |
|                         | rs76617814  | 114171234 | G : A               | 0.140                   | 3.84E-05              |                       |         | 0.91 (0.88-0.95)     | 4.52E-06 <sup>a</sup> |                       | Colorectal, Prostate         |
|                         | rs79220465  | 114171341 | A : T               | 0.140                   | 3.85E-05              |                       |         | 0.91 (0.88-0.95)     | 4.52E-06 <sup>a</sup> |                       | Colorectal, Prostate         |
|                         | rs146441240 | 114179903 | G : A               | 0.140                   | 5.16E-05              |                       |         | 0.91 (0.88-0.95)     | 6.19E-06 <sup>a</sup> |                       | Colorectal, Prostate         |
|                         | rs75374178  | 114181948 | C : T               | 0.140                   | 4.15E-05              |                       |         | 0.91 (0.88-0.95)     | 4.78E-06 <sup>a</sup> |                       | Colorectal, Prostate         |
|                         | rs17359281  | 114185959 | A : G               | 0.140                   | 3.84E-05              |                       |         | 0.91 (0.88-0.95)     | 4.57E-06 <sup>a</sup> |                       | Colorectal, Prostate         |
|                         | rs12144215  | 114187155 | G : T               | 0.131                   | 1.50E-05 <sup>a</sup> |                       |         | 0.90 (0.87-0.94)     | 2.11E-06 <sup>a</sup> |                       | Colorectal, Prostate         |
|                         | rs3761934   | 114189067 | G : T               | 0.140                   | 5.11E-05              |                       |         | 0.91 (0.88-0.95)     | 6.24E-06 <sup>a</sup> |                       | Colorectal, Prostate         |
|                         | rs41352847  | 114189880 | G : A               | 0.140                   | 5.05E-05              |                       |         | 0.91 (0.88-0.95)     | 6.15E-06 <sup>a</sup> |                       | Colorectal, Prostate         |
|                         | rs79667495  | 114191329 | T : G               | 0.140                   | 5.00E-05              |                       |         | 0.91 (0.88-0.95)     | 6.08E-06 <sup>a</sup> |                       | Colorectal, Prostate         |
|                         | rs2146018   | 114195330 | C : A               | 0.140                   | 5.54E-05              |                       |         | 0.91 (0.88-0.95)     | 6.77E-06 <sup>a</sup> |                       | Colorectal, Prostate         |
|                         | rs6678422   | 114204700 | A : G               | 0.144                   | 8.08E-05              |                       |         | 0.92 (0.88-0.95)     | 9.96E-06 <sup>a</sup> |                       | Colorectal, Prostate         |
|                         | rs76726048  | 114206699 | T : C               | 0.140                   | 6.72E-05              |                       |         | 0.91 (0.88-0.95)     | 8.10E-06 <sup>a</sup> |                       | Colorectal, Prostate         |
|                         | rs77042378  | 114209101 | G : T               | 0.137                   | 1.04E-04              |                       |         | 0.92 (0.88-0.95)     | 1.26E-05 <sup>a</sup> |                       | Colorectal, Prostate         |

|                            |           |       |       |                       |                   |                       |                  |                       |                 |                      |
|----------------------------|-----------|-------|-------|-----------------------|-------------------|-----------------------|------------------|-----------------------|-----------------|----------------------|
| rs17359378                 | 114216709 | A : T | 0.140 | 6.90E-05              |                   |                       | 0.91 (0.88-0.95) | 8.27E-06 <sup>a</sup> |                 | Colorectal, Prostate |
| rs17274627                 | 114217395 | G : A | 0.140 | 7.02E-05              |                   |                       | 0.91 (0.88-0.95) | 8.38E-06 <sup>a</sup> |                 | Colorectal, Prostate |
| rs4839333                  | 114219161 | A : T | 0.125 | 1.00E-04              |                   |                       | 0.91 (0.87-0.95) | 1.42E-05 <sup>a</sup> |                 | Colorectal, Prostate |
| rs74524050                 | 114231207 | T : C | 0.140 | 6.54E-05              |                   |                       | 0.91 (0.88-0.95) | 7.62E-06 <sup>a</sup> |                 | Colorectal, Prostate |
| rs4839336                  | 114234145 | A : T | 0.140 | 7.82E-05              |                   |                       | 0.91 (0.88-0.95) | 8.85E-06 <sup>a</sup> |                 | Colorectal, Prostate |
| rs77551704                 | 114235186 | G : C | 0.140 | 7.91E-05              |                   |                       | 0.91 (0.88-0.95) | 8.85E-06 <sup>a</sup> |                 | Colorectal, Prostate |
| rs76038270                 | 114238920 | C : G | 0.143 | 7.78E-05              |                   |                       | 0.91 (0.88-0.95) | 9.08E-06 <sup>a</sup> |                 | Colorectal, Prostate |
| rs17359468                 | 114242706 | G : A | 0.140 | 7.68E-05              |                   |                       | 0.91 (0.88-0.95) | 7.43E-06 <sup>a</sup> |                 | Colorectal, Prostate |
| rs75290614                 | 114242872 | C : T | 0.140 | 7.71E-05              |                   |                       | 0.91 (0.88-0.95) | 8.09E-06 <sup>a</sup> |                 | Colorectal, Prostate |
| rs78874053                 | 114242873 | A : T | 0.140 | 7.79E-05              |                   |                       | 0.91 (0.88-0.95) | 8.18E-06 <sup>a</sup> |                 | Colorectal, Prostate |
| rs75564289                 | 114255664 | C : G | 0.140 | 5.65E-05              |                   |                       | 0.91 (0.88-0.95) | 5.60E-06 <sup>a</sup> |                 | Colorectal, Prostate |
| rs17031795                 | 114255828 | T : C | 0.140 | 5.67E-05              |                   |                       | 0.91 (0.88-0.95) | 5.62E-06 <sup>a</sup> |                 | Colorectal, Prostate |
| rs183221482 <sup>c,d</sup> | 114259608 | T : G | 0.003 | 1.57E-04              |                   |                       | 0.05 (0.01-0.19) | 1.44E-05 <sup>a</sup> |                 | Prostate             |
| rs4589108                  | 114259625 | A : A | 0.140 | 5.38E-05              |                   |                       | 0.91 (0.88-0.95) | 5.31E-06 <sup>a</sup> |                 | Colorectal, Prostate |
| rs78552134                 | 114269666 | A : G | 0.137 | 9.07E-05              |                   |                       | 0.91 (0.88-0.95) | 8.29E-06 <sup>a</sup> |                 | Colorectal, Prostate |
| rs4839341                  | 114271662 | C : T | 0.137 | 2.68E-05              |                   |                       | 0.91 (0.87-0.95) | 2.89E-06 <sup>a</sup> |                 | Colorectal, Prostate |
| rs4393155                  | 114274247 | G : A | 0.140 | 3.06E-05              |                   |                       | 0.91 (0.88-0.95) | 2.66E-06 <sup>a</sup> |                 | Colorectal, Prostate |
| rs78483697                 | 114276709 | C : T | 0.141 | 6.28E-05              |                   |                       | 0.91 (0.88-0.95) | 6.22E-06 <sup>a</sup> |                 | Colorectal, Prostate |
| rs4839000                  | 114280135 | G : T | 0.141 | 3.03E-05              |                   |                       | 0.91 (0.88-0.95) | 2.55E-06 <sup>a</sup> |                 | Colorectal, Prostate |
| rs78394484                 | 114282758 | T : C | 0.141 | 3.21E-05              |                   |                       | 0.91 (0.88-0.95) | 2.74E-06 <sup>a</sup> |                 | Colorectal, Prostate |
| rs74610368                 | 114285303 | G : A | 0.139 | 3.18E-05              |                   |                       | 0.91 (0.87-0.95) | 2.73E-06 <sup>a</sup> |                 | Colorectal, Prostate |
| rs79198040                 | 114288691 | A : G | 0.141 | 2.53E-05 <sup>a</sup> |                   |                       | 0.91 (0.87-0.95) | 2.12E-06 <sup>a</sup> |                 | Colorectal, Prostate |
| rs74533448                 | 114292888 | C : T | 0.139 | 3.48E-05              |                   |                       | 0.91 (0.87-0.95) | 3.04E-06 <sup>a</sup> |                 | Colorectal, Prostate |
| rs112390378                | 114298509 | C : T | 0.119 | 7.54E-05              |                   |                       | 0.90 (0.86-0.94) | 7.29E-06 <sup>a</sup> |                 | Colorectal, Prostate |
| rs75746385                 | 114300892 | A : G | 0.136 | 3.06E-05              |                   |                       | 0.91 (0.87-0.95) | 2.70E-06 <sup>a</sup> |                 | Colorectal, Prostate |
| rs1217379                  | 114344083 | T : C | 0.447 | 2.47E-05 <sup>a</sup> |                   |                       | 0.94 (0.92-0.97) | 1.53E-05 <sup>a</sup> |                 | Prostate, Lung       |
| rs1217378                  | 114345418 | T : C | 0.454 | 2.63E-05 <sup>a</sup> |                   |                       | 0.94 (0.92-0.97) | 2.18E-05 <sup>a</sup> |                 | Prostate, Lung       |
| rs1217411                  | 114356125 | G : A | 0.455 | 2.13E-05 <sup>a</sup> | 1.04 (1.003-1.07) | 3.22E-02 <sup>b</sup> | 0.94 (0.92-0.97) | 4.59E-05              | Breast, Ovarian | Prostate, Lung       |
| rs1310182                  | 114373503 | G : A | 0.454 | 2.50E-05 <sup>a</sup> | 1.04 (1.003-1.07) | 3.26E-02 <sup>b</sup> | 0.94 (0.91-0.97) | 5.37E-05              | Breast, Ovarian | Prostate, Lung       |
| rs974404                   | 114382025 | T : G | 0.449 | 9.19E-06 <sup>a</sup> | 1.04 (1.01-1.07)  | 2.47E-02 <sup>b</sup> | 0.94 (0.91-0.97) | 2.43E-05 <sup>a</sup> | Breast, Ovarian | Prostate, Lung       |
| rs1217405                  | 114392632 | G : A | 0.454 | 2.57E-05 <sup>a</sup> | 1.04 (1.002-1.07) | 3.63E-02 <sup>b</sup> | 0.94 (0.92-0.97) | 4.97E-05              | Breast, Ovarian | Prostate, Lung       |
| rs1217406                  | 114393153 | C : A | 0.454 | 2.60E-05 <sup>a</sup> | 1.04 (1.002-1.07) | 3.63E-02 <sup>b</sup> | 0.94 (0.92-0.97) | 5.04E-05              | Breast, Ovarian | Prostate, Lung       |
| rs1217418                  | 114401231 | G : A | 0.455 | 2.24E-05 <sup>a</sup> |                   |                       | 0.94 (0.92-0.97) | 1.29E-05 <sup>a</sup> |                 | Prostate, Lung       |
| rs1217419                  | 114401904 | G : T | 0.454 | 2.79E-05              |                   |                       | 0.94 (0.92-0.97) | 1.57E-05 <sup>a</sup> |                 | Prostate, Lung       |
| rs1217420                  | 114402751 | G : A | 0.455 | 2.31E-05 <sup>a</sup> |                   |                       | 0.94 (0.92-0.97) | 1.45E-05 <sup>a</sup> |                 | Prostate, Lung       |
| rs6665194                  | 114417843 | G : A | 0.442 | 2.02E-05 <sup>a</sup> | 1.04 (1.003-1.07) | 3.25E-02 <sup>b</sup> | 0.94 (0.92-0.97) | 4.29E-05              | Breast, Ovarian | Prostate, Lung       |
| rs1217385                  | 114418205 | C : A | 0.442 | 1.85E-05 <sup>a</sup> | 1.04 (1.003-1.07) | 3.15E-02 <sup>b</sup> | 0.94 (0.92-0.97) | 4.02E-05              | Breast, Ovarian | Prostate, Lung       |
| rs7524200                  | 114426824 | T : G | 0.379 | 1.34E-05 <sup>a</sup> | 1.04 (1.01-1.08)  | 1.63E-02 <sup>b</sup> | 0.94 (0.91-0.97) | 5.52E-05              | Breast, Ovarian | Prostate, Lung       |
| rs2884603                  | 114427450 | A : G | 0.379 | 1.33E-05 <sup>a</sup> | 1.04 (1.01-1.08)  | 1.64E-02 <sup>b</sup> | 0.94 (0.91-0.97) | 5.43E-05              | Breast, Ovarian | Prostate, Lung       |
| rs1217392                  | 114433970 | G : T | 0.377 | 1.78E-05 <sup>a</sup> |                   |                       | 0.94 (0.91-0.97) | 2.38E-05 <sup>a</sup> |                 | Prostate, Lung       |
| rs10776775                 | 114436482 | G : A | 0.379 | 2.15E-05 <sup>a</sup> | 1.04 (1.01-1.07)  | 2.35E-02 <sup>b</sup> | 0.94 (0.91-0.97) | 6.34E-05              | Breast, Ovarian | Prostate, Lung       |
| rs10745340                 | 114436970 | T : C | 0.379 | 1.14E-05 <sup>a</sup> | 1.04 (1.01-1.07)  | 2.20E-02 <sup>b</sup> | 0.94 (0.91-0.97) | 3.44E-05              | Breast, Ovarian | Prostate, Lung       |
| rs3789613                  | 114443035 | C : G | 0.379 | 1.38E-05 <sup>a</sup> | 1.04 (1.01-1.07)  | 2.36E-02 <sup>b</sup> | 0.94 (0.91-0.97) | 3.94E-05              | Breast, Ovarian | Prostate, Lung       |
| rs7523862 <sup>e</sup>     | 114443419 | G : A | 0.379 | 1.09E-05 <sup>a</sup> |                   |                       | 0.94 (0.91-0.97) | 1.17E-05 <sup>a</sup> |                 | Prostate, Lung       |
| rs10858022                 | 114446341 | A : G | 0.377 | 1.31E-05 <sup>a</sup> | 1.04 (1.01-1.07)  | 2.48E-02 <sup>b</sup> | 0.94 (0.91-0.97) | 3.53E-05              | Breast, Ovarian | Prostate, Lung       |
| rs6661817                  | 114447034 | G : C | 0.379 | 1.20E-05 <sup>a</sup> |                   |                       | 0.94 (0.91-0.97) | 1.25E-05 <sup>a</sup> |                 | Prostate, Lung       |



|                         |           |       |        |                       |                   |                       |                  |                       |                                             |                |
|-------------------------|-----------|-------|--------|-----------------------|-------------------|-----------------------|------------------|-----------------------|---------------------------------------------|----------------|
| rs10858023              | 114448752 | C : T | 0.367  | 2.21E-05 <sup>a</sup> | 1.05 (1.003-1.09) | 3.55E-02 <sup>b</sup> | 0.94 (0.91-0.97) | 4.33E-05              | Breast                                      | Prostate, Lung |
| <i>TERC</i> (Chr. 3)    |           |       |        |                       |                   |                       |                  |                       |                                             |                |
| rs75835734              | 168720540 | G : A | 0.029  | 1.01E-05 <sup>a</sup> | 1.14 (1.08-1.21)  | 1.01E-05 <sup>a</sup> |                  |                       | Colorectal, Breast, Ovarian, Lung           |                |
| rs16853003              | 168736130 | C : T | 0.029  | 9.36E-06 <sup>a</sup> | 1.14 (1.08-1.21)  | 9.36E-06 <sup>a</sup> |                  |                       | Colorectal, Breast, Ovarian, Lung           |                |
| rs79788196              | 168742937 | T : C | 0.041  | 2.55E-06 <sup>a</sup> | 1.13 (1.07-1.19)  | 2.55E-06 <sup>a</sup> |                  |                       | Colorectal, Breast, Ovarian, Lung           |                |
| rs117527757             | 168743017 | C : T | 0.029  | 1.11E-05 <sup>a</sup> | 1.14 (1.08-1.21)  | 1.11E-05 <sup>a</sup> |                  |                       | Colorectal, Breast, Ovarian, Lung           |                |
| rs10513655              | 168747022 | A : G | 0.029  | 1.32E-05 <sup>a</sup> | 1.14 (1.07-1.21)  | 1.32E-05 <sup>a</sup> |                  |                       | Colorectal, Breast, Ovarian, Lung           |                |
| rs74329725              | 168747355 | T : G | 0.029  | 1.22E-05 <sup>a</sup> | 1.14 (1.07-1.21)  | 1.22E-05 <sup>a</sup> |                  |                       | Colorectal, Breast, Ovarian, Lung           |                |
| rs78325057              | 168749123 | C : T | 0.029  | 1.32E-05 <sup>a</sup> | 1.14 (1.07-1.21)  | 1.32E-05 <sup>a</sup> |                  |                       | Colorectal, Breast, Ovarian, Lung           |                |
| rs41521447              | 168752932 | A : C | 0.041  | 3.06E-06 <sup>a</sup> | 1.13 (1.07-1.19)  | 3.06E-06 <sup>a</sup> |                  |                       | Colorectal, Breast, Ovarian, Lung           |                |
| rs115002293             | 168759557 | G : A | 0.041  | 1.56E-06 <sup>a</sup> | 1.13 (1.08-1.19)  | 1.56E-06 <sup>a</sup> |                  |                       | Colorectal, Breast, Ovarian, Lung           |                |
| rs75963875              | 168760144 | C : T | 0.041  | 1.77E-06 <sup>a</sup> | 1.14 (1.08-1.20)  | 1.77E-06 <sup>a</sup> |                  |                       | Colorectal, Breast, Ovarian, Lung           |                |
| rs75316749              | 168761423 | A : G | 0.041  | 1.38E-06 <sup>a</sup> | 1.14 (1.08-1.20)  | 1.38E-06 <sup>a</sup> |                  |                       | Colorectal, Breast, Ovarian, Lung           |                |
| rs79934920              | 168761663 | A : G | 0.029  | 9.20E-06 <sup>a</sup> | 1.14 (1.08-1.21)  | 9.20E-06 <sup>a</sup> |                  |                       | Colorectal, Breast, Ovarian, Lung           |                |
| rs76488289              | 168764394 | G : A | 0.029  | 7.32E-06 <sup>a</sup> | 1.14 (1.08-1.21)  | 7.32E-06 <sup>a</sup> |                  |                       | Colorectal, Breast, Ovarian, Lung           |                |
| rs149662262             | 168766924 | C : G | 0.041  | 7.32E-06 <sup>a</sup> | 1.14 (1.08-1.20)  | 1.34E-06 <sup>a</sup> |                  |                       | Colorectal, Breast, Ovarian, Lung           |                |
| rs77194710              | 168769537 | T : C | 0.029  | 1.49E-05 <sup>a</sup> | 1.14 (1.07-1.21)  | 1.49E-05 <sup>a</sup> |                  |                       | Colorectal, Breast, Ovarian, Lung           |                |
| rs16853073              | 168774723 | C : T | 0.032  | 9.28E-06 <sup>a</sup> | 1.14 (1.08-1.21)  | 9.28E-06 <sup>a</sup> |                  |                       | Colorectal, Breast, Ovarian, Lung           |                |
| rs9809168               | 168803900 | T : C | 0.033  | 1.20E-05 <sup>a</sup> | 1.15 (1.08-1.22)  | 1.20E-05 <sup>a</sup> |                  |                       | Colorectal, Breast, Ovarian, Lung           |                |
| rs9809633 <sup>§</sup>  | 168804217 | T : C | 0.026  | 1.44E-05 <sup>a</sup> | 1.16 (1.09-1.24)  | 1.44E-05 <sup>a</sup> |                  |                       | Colorectal, Breast, Ovarian, Lung           |                |
| rs9826964               | 168807413 | G : A | 0.032  | 1.96E-05 <sup>a</sup> | 1.15 (1.08-1.22)  | 1.96E-05 <sup>a</sup> |                  |                       | Colorectal, Breast, Ovarian, Lung           |                |
| rs1488099               | 168860991 | A : G | 0.032  | 1.49E-05 <sup>a</sup> | 1.15 (1.08-1.22)  | 1.49E-05 <sup>a</sup> |                  |                       | Colorectal, Breast, Prostate, Ovarian, Lung |                |
| rs74677551              | 168861788 | T : G | 0.032  | 3.20E-06 <sup>a</sup> | 1.15 (1.08-1.22)  | 3.20E-06 <sup>a</sup> |                  |                       | Colorectal, Breast, Prostate, Ovarian, Lung |                |
| rs16853245              | 168862731 | T : A | 0.0303 | 1.12E-05 <sup>a</sup> | 1.16 (1.09-1.24)  | 1.12E-05 <sup>a</sup> |                  |                       | Colorectal, Breast, Ovarian, Lung           |                |
| rs111367602             | 169748004 | C : T | 0.0937 | 4.02E-05              |                   |                       | 0.86 (0.80-0.92) | 1.18E-05 <sup>a</sup> |                                             | Prostate       |
| rs16854778              | 169748111 | G : A | 0.095  | 4.48E-05              |                   |                       | 0.86 (0.81-0.92) | 1.24E-05 <sup>a</sup> |                                             | Prostate       |
| rs75286521              | 169748803 | A : G | 0.095  | 4.22E-05              |                   |                       | 0.86 (0.80-0.92) | 1.20E-05 <sup>a</sup> |                                             | Prostate       |
| rs2160902               | 169752927 | G : A | 0.098  | 1.63E-05 <sup>a</sup> |                   |                       | 0.86 (0.80-0.92) | 4.30E-06 <sup>a</sup> |                                             | Prostate       |
| rs73879159              | 169753747 | G : T | 0.392  | 2.26E-05 <sup>a</sup> |                   |                       | 0.86 (0.80-0.92) | 5.95E-06 <sup>a</sup> |                                             | Prostate       |
| rs60355509              | 169754180 | C : T | 0.102  | 3.22E-05              |                   |                       | 0.86 (0.81-0.92) | 1.06E-05 <sup>a</sup> |                                             | Prostate       |
| rs59249820              | 169755545 | C : T | 0.102  | 3.13E-05              |                   |                       | 0.86 (0.81-0.92) | 9.29E-06 <sup>a</sup> |                                             | Prostate       |
| rs2287483               | 169756846 | C : T | 0.103  | 3.80E-05              |                   |                       | 0.87 (0.81-0.92) | 1.21E-05 <sup>a</sup> |                                             | Prostate       |
| rs111477446             | 169759112 | C : T | 0.103  | 1.01E-05 <sup>a</sup> |                   |                       | 0.86 (0.81-0.92) | 1.99E-06 <sup>a</sup> |                                             | Prostate       |
| rs2287482               | 169765795 | T : G | 0.106  | 3.24E-05              |                   |                       | 0.87 (0.81-0.92) | 9.43E-06 <sup>a</sup> |                                             | Prostate       |
| rs7631178               | 169766424 | T : G | 0.106  | 4.73E-05              |                   |                       | 0.87 (0.81-0.93) | 1.49E-05 <sup>a</sup> |                                             | Prostate       |
| rs7651554               | 169768485 | C : G | 0.106  | 6.05E-05              |                   |                       | 0.87 (0.81-0.93) | 1.91E-05 <sup>a</sup> |                                             | Prostate       |
| rs73879163              | 169770802 | T : C | 0.106  | 6.31E-05              |                   |                       | 0.87 (0.82-0.93) | 1.95E-05 <sup>a</sup> |                                             | Prostate       |
| rs73879164              | 169770924 | T : C | 0.106  | 6.95E-05              |                   |                       | 0.87 (0.82-0.93) | 1.82E-05 <sup>a</sup> |                                             | Prostate       |
| rs113968946             | 169773657 | C : A | 0.106  | 6.31E-05              |                   |                       | 0.87 (0.82-0.93) | 1.95E-05 <sup>a</sup> |                                             | Prostate       |
| rs3772178               | 169773833 | T : C | 0.106  | 5.81E-05              |                   |                       | 0.87 (0.81-0.93) | 1.47E-05 <sup>a</sup> |                                             | Prostate       |
| rs16854812              | 169774383 | T : C | 0.106  | 7.40E-05              |                   |                       | 0.87 (0.82-0.93) | 2.36E-05 <sup>a</sup> |                                             | Prostate       |
| rs11925129 <sup>§</sup> | 169775228 | C : A | 0.106  | 6.80E-05              |                   |                       | 0.87 (0.82-0.93) | 1.79E-05 <sup>a</sup> |                                             | Prostate       |
| rs73879167              | 169776194 | T : G | 0.106  | 6.62E-05              |                   |                       | 0.87 (0.81-0.93) | 2.05E-05 <sup>a</sup> |                                             | Prostate       |
| rs17471922              | 169779394 | A : G | 0.110  | 2.74E-06 <sup>a</sup> |                   |                       | 0.85 (0.80-0.91) | 3.13E-07 <sup>a</sup> |                                             | Prostate       |
| rs56316750              | 169782754 | G : A | 0.111  | 1.31E-06 <sup>a</sup> |                   |                       | 0.85 (0.80-0.90) | 1.13E-07 <sup>a</sup> |                                             | Prostate       |
| rs2255256               | 169785903 | G : A | 0.115  | 9.71E-07 <sup>a</sup> |                   |                       | 0.85 (0.80-0.90) | 8.08E-08 <sup>a</sup> |                                             | Prostate       |

|             |           |       |       |                       |                  |                       |          |
|-------------|-----------|-------|-------|-----------------------|------------------|-----------------------|----------|
| rs2287479   | 169787423 | G : C | 0.114 | 1.10E-06 <sup>a</sup> | 0.85 (0.80-0.90) | 9.35E-08 <sup>a</sup> | Prostate |
| rs2287478   | 169788105 | A : C | 0.115 | 1.33E-06 <sup>a</sup> | 0.85 (0.80-0.90) | 1.15E-07 <sup>a</sup> | Prostate |
| rs76146592  | 169789234 | C : T | 0.115 | 1.30E-06 <sup>a</sup> | 0.85 (0.80-0.90) | 1.13E-07 <sup>a</sup> | Prostate |
| rs2241292   | 169798962 | C : G | 0.117 | 3.81E-06 <sup>a</sup> | 0.86 (0.81-0.91) | 3.22E-07 <sup>a</sup> | Prostate |
| rs12497114  | 169799521 | T : A | 0.117 | 1.95E-06 <sup>a</sup> | 0.85 (0.80-0.91) | 1.56E-07 <sup>a</sup> | Prostate |
| rs12493804  | 169799704 | G : A | 0.117 | 1.69E-06 <sup>a</sup> | 0.85 (0.80-0.91) | 1.38E-07 <sup>a</sup> | Prostate |
| rs16854836  | 169804730 | T : C | 0.116 | 2.80E-06 <sup>a</sup> | 0.86 (0.81-0.91) | 2.38E-07 <sup>a</sup> | Prostate |
| rs7615039   | 169806170 | G : A | 0.116 | 5.11E-06 <sup>a</sup> | 0.86 (0.81-0.91) | 4.43E-07 <sup>a</sup> | Prostate |
| rs12492606  | 169808354 | G : A | 0.116 | 3.17E-06 <sup>a</sup> | 0.86 (0.81-0.91) | 2.55E-07 <sup>a</sup> | Prostate |
| rs888507    | 169811039 | G : C | 0.116 | 4.74E-06 <sup>a</sup> | 0.86 (0.81-0.91) | 3.82E-07 <sup>a</sup> | Prostate |
| rs879161    | 169812115 | A : G | 0.116 | 3.86E-06 <sup>a</sup> | 0.86 (0.81-0.91) | 2.94E-07 <sup>a</sup> | Prostate |
| rs16854848  | 169822201 | T : C | 0.115 | 3.63E-06 <sup>a</sup> | 0.85 (0.80-0.91) | 2.95E-07 <sup>a</sup> | Prostate |
| rs6781454   | 169823096 | T : C | 0.116 | 4.32E-06 <sup>a</sup> | 0.86 (0.81-0.91) | 3.32E-07 <sup>a</sup> | Prostate |
| rs56241439  | 169830174 | T : C | 0.119 | 3.03E-06 <sup>a</sup> | 0.86 (0.81-0.91) | 2.28E-07 <sup>a</sup> | Prostate |
| rs6785202   | 169830459 | A : G | 0.116 | 2.45E-06 <sup>a</sup> | 0.85 (0.81-0.91) | 1.88E-07 <sup>a</sup> | Prostate |
| rs58417766  | 169833247 | A : G | 0.116 | 3.19E-06 <sup>a</sup> | 0.86 (0.81-0.91) | 2.42E-07 <sup>a</sup> | Prostate |
| rs7638400   | 169837787 | A : G | 0.116 | 4.30E-06 <sup>a</sup> | 0.86 (0.81-0.91) | 3.49E-07 <sup>a</sup> | Prostate |
| rs6808506   | 169839239 | G : C | 0.115 | 2.81E-06 <sup>a</sup> | 0.86 (0.81-0.91) | 2.17E-07 <sup>a</sup> | Prostate |
| rs73030653  | 169841926 | G : A | 0.116 | 2.84E-06 <sup>a</sup> | 0.86 (0.81-0.91) | 2.23E-07 <sup>a</sup> | Prostate |
| rs80038349  | 169844718 | G : T | 0.114 | 2.02E-06 <sup>a</sup> | 0.85 (0.80-0.90) | 1.50E-07 <sup>a</sup> | Prostate |
| rs73879173  | 169845604 | T : G | 0.117 | 3.52E-06 <sup>a</sup> | 0.86 (0.81-0.91) | 2.68E-07 <sup>a</sup> | Prostate |
| rs79389383  | 169858228 | G : A | 0.116 | 2.68E-06 <sup>a</sup> | 0.86 (0.81-0.91) | 2.06E-07 <sup>a</sup> | Prostate |
| rs7618919   | 169860239 | C : T | 0.116 | 2.47E-06 <sup>a</sup> | 0.86 (0.81-0.91) | 1.89E-07 <sup>a</sup> | Prostate |
| rs6809214   | 169864096 | G : A | 0.116 | 2.45E-06 <sup>a</sup> | 0.86 (0.81-0.91) | 1.89E-07 <sup>a</sup> | Prostate |
| rs6786022   | 169864154 | C : A | 0.116 | 2.47E-06 <sup>a</sup> | 0.86 (0.81-0.91) | 1.89E-07 <sup>a</sup> | Prostate |
| rs113687726 | 169867464 | G : A | 0.119 | 4.75E-06 <sup>a</sup> | 0.86 (0.81-0.91) | 3.98E-07 <sup>a</sup> | Prostate |
| rs76146702  | 169868720 | G : T | 0.116 | 2.27E-06 <sup>a</sup> | 0.85 (0.81-0.91) | 1.70E-07 <sup>a</sup> | Prostate |
| rs73879178  | 169872834 | C : T | 0.116 | 2.16E-06 <sup>a</sup> | 0.85 (0.80-0.91) | 1.63E-07 <sup>a</sup> | Prostate |
| rs57150274  | 169874634 | C : T | 0.116 | 2.13E-06 <sup>a</sup> | 0.85 (0.80-0.91) | 1.65E-07 <sup>a</sup> | Prostate |
| rs73879180  | 169874968 | T : C | 0.117 | 2.84E-06 <sup>a</sup> | 0.85 (0.81-0.91) | 2.15E-07 <sup>a</sup> | Prostate |
| rs6763396   | 169876765 | C : T | 0.116 | 2.74E-06 <sup>a</sup> | 0.86 (0.81-0.91) | 2.01E-07 <sup>a</sup> | Prostate |
| rs73879182  | 169879695 | C : T | 0.116 | 2.25E-06 <sup>a</sup> | 0.85 (0.81-0.91) | 1.70E-07 <sup>a</sup> | Prostate |
| rs12488988  | 169879860 | T : C | 0.117 | 2.54E-06 <sup>a</sup> | 0.85 (0.81-0.91) | 1.88E-07 <sup>a</sup> | Prostate |
| rs74643988  | 169883365 | A : C | 0.114 | 2.25E-06 <sup>a</sup> | 0.85 (0.80-0.91) | 1.58E-07 <sup>a</sup> | Prostate |
| rs76646441  | 169885103 | A : G | 0.117 | 2.05E-06 <sup>a</sup> | 0.85 (0.81-0.91) | 1.57E-07 <sup>a</sup> | Prostate |
| rs61493476  | 169887831 | C : A | 0.121 | 5.58E-06 <sup>a</sup> | 0.85 (0.80-0.91) | 4.38E-07 <sup>a</sup> | Prostate |
| rs3772186   | 169889331 | T : A | 0.116 | 2.64E-06 <sup>a</sup> | 0.85 (0.81-0.91) | 2.00E-07 <sup>a</sup> | Prostate |
| rs79518241  | 169890738 | T : C | 0.116 | 1.98E-06 <sup>a</sup> | 0.85 (0.80-0.91) | 1.47E-07 <sup>a</sup> | Prostate |
| rs17236830  | 169891246 | G : A | 0.116 | 1.67E-06 <sup>a</sup> | 0.85 (0.80-0.9)  | 1.22E-07 <sup>a</sup> | Prostate |
| rs16854875  | 169899667 | T : G | 0.116 | 2.79E-06 <sup>a</sup> | 0.86 (0.81-0.91) | 1.97E-07 <sup>a</sup> | Prostate |
| rs113438612 | 169901726 | C : T | 0.116 | 1.13E-06 <sup>a</sup> | 0.85 (0.80-0.9)  | 7.57E-08 <sup>a</sup> | Prostate |
| rs112269654 | 169903667 | G : A | 0.086 | 2.41E-06 <sup>a</sup> | 0.83 (0.77-0.89) | 3.78E-07 <sup>a</sup> | Prostate |
| rs77248289  | 169905625 | C : T | 0.117 | 1.58E-06 <sup>a</sup> | 0.85 (0.80-0.90) | 1.08E-07 <sup>a</sup> | Prostate |
| rs9757709   | 169906407 | T : G | 0.117 | 1.61E-06 <sup>a</sup> | 0.85 (0.80-0.90) | 1.10E-07 <sup>a</sup> | Prostate |
| rs12493954  | 169909941 | C : T | 0.115 | 8.12E-06 <sup>a</sup> | 0.86 (0.80-0.91) | 7.43E-07 <sup>a</sup> | Prostate |
| rs76336713  | 169911957 | G : T | 0.114 | 3.28E-06 <sup>a</sup> | 0.85 (0.80-0.91) | 2.87E-07 <sup>a</sup> | Prostate |

|                          |           |       |       |                       |                   |                       |                   |                       |                             |
|--------------------------|-----------|-------|-------|-----------------------|-------------------|-----------------------|-------------------|-----------------------|-----------------------------|
| rs77216745               | 169913020 | A : T | 0.114 | 1.70E-06 <sup>a</sup> |                   |                       | 0.85 (0.80-0.90)  | 1.17E-07 <sup>a</sup> | Prostate                    |
| rs113351200              | 169915772 | T : C | 0.131 | 1.40E-06 <sup>a</sup> |                   |                       | 0.85 (0.80-0.90)  | 1.02E-07 <sup>a</sup> | Prostate                    |
| rs77964281               | 169916180 | T : C | 0.117 | 3.49E-07 <sup>a</sup> |                   |                       | 0.85 (0.80-0.90)  | 2.65E-08 <sup>a</sup> | Prostate                    |
| rs6762609                | 169916919 | C : T | 0.114 | 5.64E-06 <sup>a</sup> |                   |                       | 0.85 (0.80-0.91)  | 5.57E-07 <sup>a</sup> | Prostate                    |
| rs77112641               | 169962533 | G : A | 0.081 | 1.60E-07 <sup>a</sup> |                   |                       | 0.81 (0.75-0.87)  | 2.16E-08 <sup>a</sup> | Prostate                    |
| rs140861594              | 169971557 | C : T | 0.073 | 1.76E-07 <sup>a</sup> |                   |                       | 0.79 (0.73-0.86)  | 1.09E-08 <sup>a</sup> | Prostate                    |
| rs56257047               | 169988286 | C : T | 0.162 | 1.04E-14 <sup>a</sup> |                   |                       | 0.80 (0.76-0.85)  | 4.28E-16 <sup>a</sup> | Prostate                    |
| rs71277158               | 169999216 | T : G | 0.162 | 8.88E-15 <sup>a</sup> |                   |                       | 0.80 (0.76-0.84)  | 3.64E-16 <sup>a</sup> | Prostate                    |
| rs75313056               | 170017609 | G : A | 0.082 | 1.51E-08 <sup>a</sup> |                   |                       | 0.80 (0.74-0.86)  | 9.54E-10 <sup>a</sup> | Prostate                    |
| rs73879193               | 170018499 | A : G | 0.135 | 7.27E-13 <sup>a</sup> |                   |                       | 0.79 (0.75-0.84)  | 5.39E-14 <sup>a</sup> | Prostate                    |
| rs4955720                | 170028600 | C : A | 0.405 | 1.37E-04              |                   |                       | 0.94 (0.92-0.97)  | 2.44E-05 <sup>a</sup> | Colorectal, Prostate        |
| rs2901621                | 170057704 | G : C | 0.098 | 1.77E-05 <sup>a</sup> |                   |                       | 0.93 (0.91-0.96)  | 3.52E-06 <sup>a</sup> | Colorectal, Prostate        |
| rs6444912                | 170061629 | C : T | 0.397 | 6.87E-05              |                   |                       | 0.94 (0.91-0.97)  | 1.42E-05 <sup>a</sup> | Colorectal, Prostate        |
| rs6444914                | 170061756 | G : A | 0.408 | 2.50E-05              |                   |                       | 0.94 (0.91-0.96)  | 4.23E-06 <sup>a</sup> | Colorectal, Prostate        |
| rs17826519               | 170062936 | A : G | 0.422 | 1.02E-06 <sup>a</sup> | 1.11 (1.06-1.16)  | 1.32E-06 <sup>a</sup> | 0.94 (0.89-0.998) | 4.37E-02 <sup>b</sup> | Prostate<br>Ovarian         |
| rs75982374               | 170063227 | A : G | 0.140 | 4.65E-13 <sup>a</sup> |                   |                       | 0.79 (0.74-0.84)  | 2.62E-14 <sup>a</sup> | Prostate                    |
| rs76925190               | 170066339 | A : C | 0.173 | 1.25E-14 <sup>a</sup> |                   |                       | 0.80 (0.76-0.84)  | 6.27E-16 <sup>a</sup> | Prostate                    |
| rs9815664                | 170069655 | G : A | 0.427 | 6.94E-05              |                   |                       | 0.94 (0.91-0.97)  | 2.05E-05 <sup>a</sup> | Colorectal, Prostate        |
| rs10804839 <sup>f</sup>  | 170071783 | A : T | 0.426 | 1.01E-06 <sup>a</sup> | 1.1 (1.06-1.15)   | 1.57E-06 <sup>a</sup> | 0.94 (0.89-0.996) | 3.62E-02 <sup>b</sup> | Prostate<br>Ovarian         |
| rs10804840               | 170071807 | G : A | 0.426 | 2.84E-06 <sup>a</sup> | 1.1 (1.06-1.15)   | 4.64E-06 <sup>a</sup> | 0.94 (0.89-0.996) | 3.70E-02 <sup>b</sup> | Prostate<br>Ovarian         |
| rs78416326               | 170074517 | G : C | 0.190 | 1.41E-13 <sup>a</sup> |                   |                       | 0.81 (0.77-0.86)  | 1.76E-14 <sup>a</sup> | Prostate                    |
| rs61436251               | 170083629 | C : G | 0.181 | 8.80E-14 <sup>a</sup> |                   |                       | 0.81 (0.76-0.85)  | 6.61E-15 <sup>a</sup> | Prostate                    |
| 3:170092057 <sup>d</sup> | 170092057 | A : C | 0.130 | 2.69E-06 <sup>a</sup> |                   |                       | 0.80 (0.74-0.87)  | 1.66E-07 <sup>a</sup> | Prostate                    |
| rs4582064                | 170095914 | C : T | 0.379 | 2.42E-07 <sup>a</sup> | 1.04 (1.001-1.08) | 4.61E-02 <sup>b</sup> | 0.89 (0.86-0.93)  | 2.73E-07 <sup>a</sup> | Breast, Ovarian<br>Prostate |
| rs80304993               | 170097606 | G : A | 0.230 | 6.54E-15 <sup>a</sup> |                   |                       | 0.82 (0.78-0.86)  | 1.51E-15 <sup>a</sup> | Prostate                    |
| rs61212679 <sup>f</sup>  | 170098439 | A : T | 0.434 | 1.54E-07 <sup>a</sup> | 1.11 (1.07-1.16)  | 2.39E-07 <sup>a</sup> | 0.93 (0.87-0.994) | 3.28E-02 <sup>b</sup> | Prostate<br>Ovarian         |
| rs12487040               | 170103592 | T : C | 0.372 | 1.70E-08 <sup>a</sup> | 1.05 (1.01-1.09)  | 2.46E-02 <sup>b</sup> | 0.89 (0.85-0.93)  | 3.13E-08 <sup>a</sup> | Breast, Ovarian<br>Prostate |
| rs11720323               | 170104013 | G : C | 0.375 | 4.12E-08 <sup>a</sup> | 1.05 (1.01-1.09)  | 2.43E-02 <sup>b</sup> | 0.89 (0.85-0.93)  | 8.04E-08 <sup>a</sup> | Breast, Ovarian<br>Prostate |
| rs62293480               | 170106672 | G : T | 0.388 | 1.35E-06 <sup>a</sup> |                   |                       | 0.89 (0.84-0.93)  | 5.97E-07 <sup>a</sup> | Prostate                    |
| rs62293481 <sup>f</sup>  | 170109434 | C : G | 0.442 | 1.98E-08 <sup>a</sup> | 1.12 (1.08-1.16)  | 1.04E-08 <sup>a</sup> |                   |                       | Prostate                    |
| rs1045210                | 170114078 | A : C | 0.377 | 2.01E-08 <sup>a</sup> | 1.05 (1.01-1.09)  | 2.25E-02 <sup>b</sup> | 0.89 (0.85-0.93)  | 4.10E-08 <sup>a</sup> | Breast, Ovarian<br>Prostate |
| rs59758024 <sup>f</sup>  | 170119352 | A : T | 0.447 | 9.03E-09 <sup>a</sup> | 1.12 (1.08-1.17)  | 7.08E-09 <sup>a</sup> |                   |                       | Prostate                    |
| rs6768083                | 170120253 | T : A | 0.338 | 1.31E-07 <sup>a</sup> | 1.04 (1.000-1.08) | 4.92E-02 <sup>b</sup> | 0.89 (0.85-0.93)  | 1.34E-07 <sup>a</sup> | Breast, Ovarian<br>Prostate |
| rs2421927                | 170121153 | A : G | 0.339 | 1.38E-07 <sup>a</sup> |                   |                       | 0.89 (0.85-0.93)  | 1.26E-07 <sup>a</sup> | Prostate                    |
| rs55953261               | 170121598 | G : A | 0.488 | 4.58E-09 <sup>a</sup> |                   |                       | 0.89 (0.85-0.92)  | 3.57E-09 <sup>a</sup> | Prostate                    |
| rs12486850               | 170122676 | G : A | 0.340 | 1.02E-07 <sup>a</sup> | 1.04 (1.001-1.08) | 4.41E-02 <sup>b</sup> | 0.89 (0.85-0.93)  | 1.15E-07 <sup>a</sup> | Breast, Ovarian<br>Prostate |
| rs6444923                | 170122784 | C : T | 0.342 | 2.01E-07 <sup>a</sup> |                   |                       | 0.89 (0.85-0.93)  | 1.66E-07 <sup>a</sup> | Prostate                    |
| rs6762828                | 170122872 | C : T | 0.340 | 1.03E-07 <sup>a</sup> | 1.04 (1.001-1.08) | 4.47E-02 <sup>b</sup> | 0.89 (0.85-0.93)  | 1.15E-07 <sup>a</sup> | Breast, Ovarian<br>Prostate |
| rs6444924                | 170123048 | A : C | 0.340 | 2.13E-07 <sup>a</sup> | 1.04 (1.000-1.08) | 4.89E-02 <sup>b</sup> | 0.89 (0.85-0.93)  | 2.26E-07 <sup>a</sup> | Breast, Ovarian<br>Prostate |
| rs56121376               | 170123144 | T : C | 0.491 | 6.92E-09 <sup>a</sup> |                   |                       | 0.89 (0.85-0.92)  | 4.67E-09 <sup>a</sup> | Prostate                    |
| rs12488537               | 170124354 | C : T | 0.343 | 2.18E-07 <sup>a</sup> |                   |                       | 0.89 (0.85-0.93)  | 1.86E-07 <sup>a</sup> | Prostate                    |
| rs12491115               | 170125604 | A : T | 0.340 | 6.69E-08 <sup>a</sup> | 1.04 (1.001-1.08) | 4.47E-02 <sup>b</sup> | 0.89 (0.85-0.93)  | 7.28E-08 <sup>a</sup> | Breast, Ovarian<br>Prostate |
| rs12634437               | 170126305 | A : G | 0.340 | 2.18E-07 <sup>a</sup> |                   |                       | 0.89 (0.85-0.93)  | 2.10E-07 <sup>a</sup> | Prostate                    |
| rs62293497               | 170126565 | T : G | 0.356 | 8.17E-06 <sup>a</sup> |                   |                       | 0.91 (0.87-0.95)  | 6.54E-06 <sup>a</sup> | Prostate                    |
| rs7644073                | 170126670 | G : A | 0.331 | 4.34E-07 <sup>a</sup> |                   |                       | 0.89 (0.85-0.93)  | 4.55E-07 <sup>a</sup> | Prostate                    |
| rs148376875              | 170126707 | G : T | 0.125 | 1.32E-10 <sup>a</sup> |                   |                       | 0.80 (0.75-0.85)  | 1.96E-11 <sup>a</sup> | Prostate                    |

|                              |           |       |       |                       |                   |                       |                   |                       |                      |                              |
|------------------------------|-----------|-------|-------|-----------------------|-------------------|-----------------------|-------------------|-----------------------|----------------------|------------------------------|
| rs77085460                   | 170127536 | A : G | 0.063 | 7.30E-09 <sup>a</sup> |                   |                       | 0.76 (0.70-0.83)  | 3.81E-10 <sup>a</sup> |                      | Prostate                     |
| rs13071543                   | 170127919 | C : T | 0.340 | 2.78E-07 <sup>a</sup> | 1.04 (1.001-1.08) | 4.52E-02 <sup>b</sup> | 0.89 (0.86-0.93)  | 3.23E-07 <sup>a</sup> | Breast, Ovarian      | Prostate                     |
| rs13096001                   | 170128750 | T : G | 0.356 | 1.15E-05 <sup>a</sup> |                   |                       | 0.91 (0.87-0.95)  | 1.09E-05 <sup>a</sup> |                      | Prostate                     |
| rs10936632 <sup>§</sup>      | 170130102 | A : C | 0.491 | 1.22E-08 <sup>a</sup> | 1.07 (1.003-1.14) | 4.08E-02 <sup>b</sup> | 0.89 (0.86-0.93)  | 1.34E-08 <sup>a</sup> | Ovarian              | Prostate                     |
| rs62293498                   | 170132824 | C : T | 0.344 | 7.58E-07 <sup>a</sup> | 1.04 (1.001-1.08) | 4.70E-02 <sup>b</sup> | 0.90 (0.86-0.94)  | 8.96E-07 <sup>a</sup> | Breast, Ovarian      | Prostate                     |
| rs35763188                   | 170133401 | A : G | 0.346 | 2.87E-07 <sup>a</sup> | 1.04 (1.003-1.08) | 3.50E-02 <sup>b</sup> | 0.90 (0.86-0.93)  | 4.32E-07 <sup>a</sup> | Breast, Ovarian      | Prostate                     |
| rs10804842                   | 170135700 | T : C | 0.234 | 1.73E-08 <sup>a</sup> |                   |                       | 0.86 (0.82-0.90)  | 1.94E-09 <sup>a</sup> |                      | Prostate                     |
| rs62293499                   | 170140153 | A : C | 0.336 | 2.38E-07 <sup>a</sup> | 1.04 (1.004-1.08) | 3.08E-02 <sup>b</sup> | 0.90 (0.86-0.93)  | 4.03E-07 <sup>a</sup> | Breast, Ovarian      | Prostate                     |
| rs2422035                    | 170145272 | G : A | 0.336 | 2.03E-07 <sup>a</sup> | 1.04 (1.004-1.08) | 3.07E-02 <sup>b</sup> | 0.90 (0.86-0.93)  | 3.41E-07 <sup>a</sup> | Breast, Ovarian      | Prostate                     |
| rs9865021                    | 170146881 | C : T | 0.487 | 2.48E-06 <sup>a</sup> | 1.10 (1.06-1.14)  | 2.11E-06 <sup>a</sup> |                   |                       | Prostate             |                              |
| rs6794467                    | 170147991 | C : A | 0.487 | 3.43E-06 <sup>a</sup> | 1.10 (1.06-1.14)  | 2.99E-06 <sup>a</sup> |                   |                       | Prostate             |                              |
| rs6770844                    | 170150812 | T : C | 0.336 | 1.95E-07 <sup>a</sup> | 1.04 (1.004-1.08) | 2.99E-02 <sup>b</sup> | 0.90 (0.86-0.93)  | 3.36E-07 <sup>a</sup> | Breast, Ovarian      | Prostate                     |
| rs7610584                    | 170153183 | C : T | 0.491 | 2.34E-05 <sup>a</sup> | 1.09 (1.05-1.13)  | 1.78E-05 <sup>a</sup> |                   |                       | Prostate             |                              |
| rs9811071                    | 170156832 | C : T | 0.489 | 3.60E-06 <sup>a</sup> | 1.10 (1.06-1.15)  | 1.79E-06 <sup>a</sup> |                   |                       | Prostate             |                              |
| rs10936633                   | 170158128 | G : A | 0.493 | 1.49E-06 <sup>a</sup> |                   |                       | 0.90 (0.87-0.94)  | 7.74E-07 <sup>a</sup> |                      | Prostate                     |
| rs969217                     | 170159134 | C : T | 0.391 | 2.73E-07 <sup>a</sup> | 1.06 (1.02-1.11)  | 2.62E-03              | 0.90 (0.87-0.94)  | 5.47E-06 <sup>a</sup> | Breast               | Prostate                     |
| rs1035298                    | 170160493 | C : T | 0.389 | 3.37E-06 <sup>a</sup> | 1.05 (1.02-1.09)  | 1.41E-03              | 0.91 (0.87-0.96)  | 1.46E-04              | Breast, Ovarian      | Prostate                     |
| <i>GAR1</i> (Chr. 4)         |           |       |       |                       |                   |                       |                   |                       |                      |                              |
| rs17042238 <sup>d</sup>      | 111745854 | A : G | 0.003 | 6.33E-06 <sup>a</sup> |                   |                       | 0.04 (0.01-0.16)  | 6.33E-06 <sup>a</sup> |                      | Prostate                     |
| <i>TERT-CLPTMIL</i> (Chr. 5) |           |       |       |                       |                   |                       |                   |                       |                      |                              |
| rs6861230                    | 304003    | T : C | 0.042 | 2.70E-05              | 1.25 (1.13-1.37)  | 5.83E-06 <sup>a</sup> |                   |                       | Breast, Ovarian      |                              |
| rs33961405 <sup>§</sup>      | 1277577   | A : G | 0.491 | 1.20E-05 <sup>a</sup> | 1.11 (1.06-1.16)  | 4.55E-06 <sup>a</sup> |                   |                       | Lung                 |                              |
| rs7726159 <sup>§</sup>       | 1282319   | C : A | 0.338 | 9.41E-09 <sup>a</sup> | 1.12 (1.07-1.17)  | 3.42E-07 <sup>a</sup> | 0.91 (0.85-0.96)  | 1.22E-03              | Lung                 | Prostate                     |
| rs7725218 <sup>§</sup>       | 1282414   | G : A | 0.359 | 3.02E-09 <sup>a</sup> | 1.12 (1.07-1.17)  | 3.14E-07 <sup>a</sup> | 0.90 (0.85-0.96)  | 4.04E-04              | Lung                 | Prostate                     |
| rs7713218                    | 1283312   | G : A | 0.497 | 5.78E-08 <sup>a</sup> | 1.10 (1.06-1.14)  | 6.60E-07 <sup>a</sup> | 0.95 (0.91-0.98)  | 4.23E-03              | Ovarian, Lung        | Colorectal, Prostate         |
| rs7717443                    | 1283486   | C : T | 0.483 | 5.37E-07 <sup>a</sup> | 1.10 (1.06-1.14)  | 2.24E-06 <sup>a</sup> | 0.95 (0.91-0.98)  | 1.31E-02 <sup>b</sup> | Ovarian, Lung        | Colorectal, Prostate         |
| rs4449583                    | 1284135   | C : T | 0.334 | 9.18E-09 <sup>a</sup> | 1.10 (1.06-1.14)  | 1.83E-07 <sup>a</sup> | 0.91 (0.86-0.97)  | 2.22E-03              | Ovarian, Lung        | Prostate                     |
| rs35029535                   | 1284976   | C : T | 0.352 | 5.54E-08 <sup>a</sup> | 1.09 (1.03-1.15)  | 2.09E-03              | 0.92 (0.89-0.95)  | 1.28E-06 <sup>a</sup> | Prostate             | Breast, Ovarian, Lung        |
| rs10866498                   | 1285162   | C : T | 0.472 | 6.36E-08 <sup>a</sup> | 1.05 (1.01-1.09)  | 6.76E-03              | 0.91 (0.88-0.94)  | 4.57E-07 <sup>a</sup> | Colorectal, Prostate | Ovarian, Lung                |
| rs7705526 <sup>§</sup>       | 1285974   | C : A | 0.319 | 3.53E-08 <sup>a</sup> | 1.13 (1.08-1.18)  | 3.91E-08 <sup>a</sup> | 0.95 (0.90-0.998) | 4.26E-02 <sup>b</sup> | Lung                 | Colorectal, Prostate         |
| rs2736100 <sup>§</sup>       | 1286516   | C : A | 0.500 | 3.38E-10 <sup>a</sup> | 1.05 (1.01-1.09)  | 1.72E-02 <sup>b</sup> | 0.90 (0.86-0.93)  | 7.54E-10 <sup>a</sup> | Colorectal, Prostate | Lung                         |
| rs2853677 <sup>§</sup>       | 1287194   | A : G | 0.400 | 1.33E-06 <sup>a</sup> | 1.11 (1.06-1.16)  | 1.54E-06 <sup>a</sup> | 0.97 (0.93-1.000) | 4.99E-02 <sup>b</sup> | Lung                 | Colorectal, Breast, Prostate |
| rs2736099 <sup>§</sup>       | 1287340   | G : A | 0.344 | 8.62E-09 <sup>a</sup> | 1.12 (1.08-1.17)  | 1.75E-07 <sup>a</sup> | 0.95 (0.92-0.98)  | 2.18E-03              | Lung                 | Colorectal, Breast, Prostate |
| rs2853672 <sup>§</sup>       | 1292983   | A : C | 0.496 | 8.80E-07 <sup>a</sup> | 1.09 (1.05-1.14)  | 1.27E-05 <sup>a</sup> | 0.94 (0.91-0.98)  | 3.90E-03              | Lung                 | Colorectal, Prostate         |
| rs2736098 <sup>§</sup>       | 1294086   | C : T | 0.234 | 2.48E-07 <sup>a</sup> | 1.08 (1.04-1.12)  | 1.81E-04              | 0.93 (0.90-0.97)  | 7.16E-05              | Prostate, Lung       | Colorectal, Breast, Ovarian  |
| rs2853669 <sup>§</sup>       | 1295349   | A : G | 0.286 | 1.94E-07 <sup>a</sup> | 1.08 (1.04-1.12)  | 7.65E-05              | 0.94 (0.91-0.97)  | 1.31E-04              | Prostate, Lung       | Colorectal, Breast, Ovarian  |
| rs2735940 <sup>§</sup>       | 1296486   | G : A | 0.499 | 7.44E-09 <sup>a</sup> | 1.09 (1.05-1.14)  | 1.91E-05              | 0.93 (0.90-0.96)  | 1.70E-05              | Lung                 | Colorectal, Prostate         |
| rs2736109 <sup>§</sup>       | 1296759   | C : T | 0.392 | 2.99E-06 <sup>a</sup> | 1.11 (1.06-1.16)  | 5.88E-06 <sup>a</sup> | 0.96 (0.93-0.996) | 3.08E-02 <sup>b</sup> | Lung                 | Colorectal, Breast, Ovarian  |
| rs2736108 <sup>§</sup>       | 1297488   | C : T | 0.276 | 3.97E-07 <sup>a</sup> | 1.08 (1.04-1.12)  | 1.20E-04              | 0.94 (0.91-0.97)  | 1.78E-04              | Prostate, Lung       | Colorectal, Breast, Ovarian  |
| rs2735948 <sup>§</sup>       | 1299213   | G : A | 0.418 | 7.70E-08 <sup>a</sup> |                   |                       | 0.88 (0.85-0.92)  | 5.56E-09 <sup>a</sup> |                      | Lung                         |
| rs2735947 <sup>§</sup>       | 1299392   | G : A | 0.141 | 1.55E-06 <sup>a</sup> |                   |                       | 0.85 (0.79-0.90)  | 9.79E-08 <sup>a</sup> |                      | Lung                         |
| rs2736102                    | 1302144   | C : T | 0.365 | 3.73E-06 <sup>a</sup> |                   |                       | 0.90 (0.86-0.94)  | 4.01E-07 <sup>a</sup> |                      | Lung                         |
| rs2853666 <sup>§</sup>       | 1302914   | A : G | 0.364 | 4.35E-06 <sup>a</sup> |                   |                       | 0.90 (0.86-0.94)  | 3.95E-07 <sup>a</sup> |                      | Lung                         |
| rs2735945 <sup>§</sup>       | 1303901   | C : T | 0.363 | 4.79E-06 <sup>a</sup> |                   |                       | 0.90 (0.86-0.94)  | 4.69E-07 <sup>a</sup> |                      | Lung                         |
| rs2735944 <sup>§</sup>       | 1304432   | C : T | 0.132 | 1.27E-06 <sup>a</sup> |                   |                       | 0.85 (0.80-0.90)  | 1.38E-07 <sup>a</sup> |                      | Lung                         |
| rs4404721 <sup>§</sup>       | 1306165   | C : T | 0.389 | 2.92E-06 <sup>a</sup> |                   |                       | 0.90 (0.86-0.94)  | 2.61E-07 <sup>a</sup> |                      | Lung                         |

|                            |         |       |       |                       |                  |                       |                       |      |
|----------------------------|---------|-------|-------|-----------------------|------------------|-----------------------|-----------------------|------|
| rs4530805 <sup>§</sup>     | 1306331 | C : T | 0.387 | 5.82E-07 <sup>a</sup> |                  | 0.89 (0.86-0.93)      | 5.11E-08 <sup>a</sup> | Lung |
| rs7446461 <sup>§</sup>     | 1306521 | G : C | 0.169 | 1.09E-08 <sup>a</sup> |                  | 0.85 (0.81-0.90)      | 1.70E-09 <sup>a</sup> | Lung |
| rs11133727 <sup>c,§</sup>  | 1306765 | G : C | 0.408 | 2.02E-06 <sup>a</sup> |                  | 0.90 (0.86-0.93)      | 1.26E-07 <sup>a</sup> | Lung |
| rs1251843 <sup>c,§</sup>   | 1307469 | T : C | 0.422 | 7.85E-06 <sup>a</sup> |                  | 0.90 (0.87-0.94)      | 2.27E-06 <sup>a</sup> | Lung |
| rs186023279 <sup>b</sup>   | 1307606 | G : T | 0.425 | 1.92E-08 <sup>a</sup> | 1.15 (1.10-1.21) | 1.42E-08 <sup>a</sup> |                       | Lung |
| rs190785038 <sup>b</sup>   | 1307616 | A : G | 0.385 | 2.47E-05              | 1.12 (1.07-1.18) | 4.71E-06 <sup>a</sup> |                       | Lung |
| rs186156459                | 1307647 | T : C | 0.141 | 3.60E-05              |                  | 0.87 (0.82-0.92)      | 6.21E-06 <sup>a</sup> | Lung |
| rs4635969 <sup>§</sup>     | 1308552 | G : A | 0.195 | 1.17E-08 <sup>a</sup> |                  | 0.87 (0.83-0.91)      | 1.25E-09 <sup>a</sup> | Lung |
| rs61574973 <sup>§</sup>    | 1309168 | C : T | 0.389 | 1.39E-07 <sup>a</sup> |                  | 0.90 (0.86-0.93)      | 9.72E-09 <sup>a</sup> | Lung |
| rs60622800                 | 1309904 | A : G | 0.410 | 2.46E-07 <sup>a</sup> |                  | 0.90 (0.87-0.93)      | 1.36E-08 <sup>a</sup> | Lung |
| rs6554758 <sup>§</sup>     | 1310152 | A : G | 0.413 | 1.67E-07 <sup>a</sup> |                  | 0.90 (0.86-0.93)      | 9.25E-09 <sup>a</sup> | Lung |
| rs6866294 <sup>§</sup>     | 1311693 | C : T | 0.442 | 1.11E-07 <sup>a</sup> |                  | 0.90 (0.87-0.93)      | 6.41E-09 <sup>a</sup> | Lung |
| rs6866783 <sup>§</sup>     | 1312020 | C : T | 0.421 | 5.37E-08 <sup>a</sup> |                  | 0.90 (0.86-0.93)      | 3.63E-09 <sup>a</sup> | Lung |
| rs35953391 <sup>§</sup>    | 1312329 | C : T | 0.201 | 6.44E-09 <sup>a</sup> |                  | 0.87 (0.83-0.91)      | 1.43E-09 <sup>a</sup> | Lung |
| rs13356727 <sup>§</sup>    | 1312457 | A : G | 0.442 | 1.16E-07 <sup>a</sup> |                  | 0.90 (0.87-0.93)      | 6.20E-09 <sup>a</sup> | Lung |
| rs13355267                 | 1312935 | C : T | 0.449 | 3.06E-06 <sup>a</sup> |                  | 0.91 (0.87-0.94)      | 2.65E-07 <sup>a</sup> | Lung |
| rs36115365 <sup>§</sup>    | 1313242 | G : C | 0.201 | 6.86E-09 <sup>a</sup> |                  | 0.87 (0.83-0.91)      | 1.41E-09 <sup>a</sup> | Lung |
| rs28379291 <sup>§</sup>    | 1313701 | G : A | 0.421 | 4.74E-08 <sup>a</sup> |                  | 0.90 (0.86-0.93)      | 3.14E-09 <sup>a</sup> | Lung |
| rs10078017 <sup>§</sup>    | 1314009 | T : C | 0.421 | 8.11E-08 <sup>a</sup> |                  | 0.90 (0.86-0.93)      | 5.86E-09 <sup>a</sup> | Lung |
| rs4975615 <sup>§</sup>     | 1315343 | A : G | 0.425 | 9.16E-08 <sup>a</sup> |                  | 0.90 (0.86-0.93)      | 5.67E-09 <sup>a</sup> | Lung |
| rs4975616 <sup>§</sup>     | 1315660 | A : G | 0.445 | 1.18E-07 <sup>a</sup> |                  | 0.90 (0.87-0.93)      | 6.07E-09 <sup>a</sup> | Lung |
| rs13170453 <sup>§</sup>    | 1317481 | A : G | 0.224 | 2.43E-11 <sup>a</sup> |                  | 0.85 (0.82-0.89)      | 2.28E-12 <sup>a</sup> | Lung |
| rs3816659 <sup>§</sup>     | 1317820 | G : A | 0.441 | 2.44E-10 <sup>a</sup> |                  | 0.88 (0.85-0.91)      | 9.97E-12 <sup>a</sup> | Lung |
| rs451360 <sup>§</sup>      | 1319680 | C : A | 0.216 | 4.40E-11 <sup>a</sup> |                  | 0.85 (0.82-0.89)      | 2.54E-12 <sup>a</sup> | Lung |
| rs421629 <sup>§</sup>      | 1320136 | G : A | 0.455 | 4.63E-10 <sup>a</sup> |                  | 0.88 (0.85-0.92)      | 1.80E-11 <sup>a</sup> | Lung |
| rs380286 <sup>§</sup>      | 1320247 | G : A | 0.455 | 3.87E-10 <sup>a</sup> |                  | 0.88 (0.85-0.92)      | 1.49E-11 <sup>a</sup> | Lung |
| rs401681 <sup>§</sup>      | 1322087 | C : T | 0.460 | 3.13E-09 <sup>a</sup> |                  | 0.89 (0.86-0.92)      | 1.32E-10 <sup>a</sup> | Lung |
| rs381949 <sup>§</sup>      | 1322468 | G : A | 0.425 | 1.47E-09 <sup>a</sup> |                  | 0.89 (0.85-0.92)      | 5.99E-11 <sup>a</sup> | Lung |
| rs13178866 <sup>§</sup>    | 1323212 | C : T | 0.455 | 5.81E-10 <sup>a</sup> |                  | 0.89 (0.85-0.92)      | 2.28E-11 <sup>a</sup> | Lung |
| rs113097933 <sup>c,§</sup> | 1323412 | G : A | 0.117 | 8.69E-07 <sup>a</sup> |                  | 0.83 (0.78-0.89)      | 6.10E-08 <sup>a</sup> | Lung |
| rs139928219 <sup>c,§</sup> | 1323504 | C : T | 0.129 | 4.52E-07 <sup>a</sup> |                  | 0.83 (0.78-0.89)      | 4.03E-08 <sup>a</sup> | Lung |
| rs414965 <sup>§</sup>      | 1324121 | G : A | 0.427 | 9.28E-10 <sup>a</sup> |                  | 0.89 (0.85-0.92)      | 3.74E-11 <sup>a</sup> | Lung |
| rs421284 <sup>§</sup>      | 1325590 | T : C | 0.467 | 5.70E-10 <sup>a</sup> |                  | 0.89 (0.85-0.92)      | 2.23E-11 <sup>a</sup> | Lung |
| rs466502 <sup>c,§</sup>    | 1325767 | A : G | 0.463 | 5.83E-10 <sup>a</sup> |                  | 0.89 (0.85-0.92)      | 2.29E-11 <sup>a</sup> | Lung |
| rs465498 <sup>§</sup>      | 1325803 | A : G | 0.463 | 5.63E-10 <sup>a</sup> |                  | 0.89 (0.85-0.92)      | 2.21E-11 <sup>a</sup> | Lung |
| rs383009                   | 1327851 | C : T | 0.437 | 7.71E-10 <sup>a</sup> |                  | 0.88 (0.85-0.92)      | 5.77E-11 <sup>a</sup> | Lung |
| rs76879431 <sup>c</sup>    | 1328459 | C : A | 0.251 | 5.78E-05              |                  | 0.88 (0.84-0.93)      | 8.96E-06 <sup>a</sup> | Lung |
| rs380145 <sup>§</sup>      | 1328897 | C : T | 0.226 | 8.22E-11 <sup>a</sup> |                  | 0.86 (0.82-0.89)      | 4.37E-12 <sup>a</sup> | Lung |
| rs452932 <sup>§</sup>      | 1330253 | T : C | 0.463 | 1.12E-09 <sup>a</sup> |                  | 0.88 (0.85-0.92)      | 6.68E-11 <sup>a</sup> | Lung |
| rs452384 <sup>§</sup>      | 1330840 | T : C | 0.460 | 6.32E-10 <sup>a</sup> |                  | 0.89 (0.85-0.92)      | 2.49E-11 <sup>a</sup> | Lung |
| rs370348 <sup>§</sup>      | 1331219 | A : G | 0.464 | 4.80E-10 <sup>a</sup> |                  | 0.88 (0.85-0.92)      | 1.87E-11 <sup>a</sup> | Lung |
| rs2447853 <sup>§</sup>     | 1333077 | A : G | 0.486 | 4.95E-10 <sup>a</sup> |                  | 0.88 (0.85-0.92)      | 1.93E-11 <sup>a</sup> | Lung |
| rs467095 <sup>§</sup>      | 1336221 | T : C | 0.464 | 1.48E-09 <sup>a</sup> |                  | 0.88 (0.85-0.92)      | 8.04E-11 <sup>a</sup> | Lung |
| rs455433 <sup>§</sup>      | 1336243 | A : G | 0.467 | 5.87E-10 <sup>a</sup> |                  | 0.89 (0.85-0.92)      | 2.30E-11 <sup>a</sup> | Lung |
| rs460073 <sup>§</sup>      | 1336459 | T : C | 0.467 | 5.78E-10 <sup>a</sup> |                  | 0.89 (0.85-0.92)      | 2.27E-11 <sup>a</sup> | Lung |
| rs456366 <sup>§</sup>      | 1337070 | T : C | 0.467 | 5.82E-10 <sup>a</sup> |                  | 0.89 (0.85-0.92)      | 2.28E-11 <sup>a</sup> | Lung |

|                            |           |       |       |                       |                  |                       |                   |                       |  |                                 |
|----------------------------|-----------|-------|-------|-----------------------|------------------|-----------------------|-------------------|-----------------------|--|---------------------------------|
| rs36019446                 | 1339890   | A : G | 0.484 | 1.57E-07 <sup>a</sup> |                  |                       | 0.88 (0.85-0.92)  | 1.05E-08 <sup>a</sup> |  | Lung                            |
| rs42269                    | 1339985   | C : A | 0.367 | 1.72E-08 <sup>a</sup> |                  |                       | 0.88 (0.85-0.92)  | 1.02E-09 <sup>a</sup> |  | Lung                            |
| rs55901723                 | 1342154   | T : C | 0.232 | 2.14E-05              |                  |                       | 0.88 (0.84-0.93)  | 2.94E-06 <sup>a</sup> |  | Lung                            |
| rs111986123 <sup>g</sup>   | 1342157   | A : G | 0.433 | 1.27E-09 <sup>a</sup> |                  |                       | 0.88 (0.85-0.92)  | 8.03E-11 <sup>a</sup> |  | Lung                            |
| rs31489 <sup>g</sup>       | 1342714   | C : A | 0.433 | 1.71E-09 <sup>a</sup> |                  |                       | 0.89 (0.86-0.92)  | 7.01E-11 <sup>a</sup> |  | Lung                            |
| rs31490 <sup>g</sup>       | 1344458   | G : A | 0.463 | 4.86E-09 <sup>a</sup> |                  |                       | 0.89 (0.86-0.92)  | 3.49E-10 <sup>a</sup> |  | Lung                            |
| rs27996 <sup>g</sup>       | 1345474   | A : G | 0.451 | 1.11E-09 <sup>a</sup> |                  |                       | 0.88 (0.85-0.92)  | 4.45E-11 <sup>a</sup> |  | Lung                            |
| rs27071 <sup>g</sup>       | 1346081   | T : C | 0.264 | 4.66E-10 <sup>a</sup> |                  |                       | 0.86 (0.83-0.90)  | 2.37E-11 <sup>a</sup> |  | Lung                            |
| rs27069 <sup>g</sup>       | 1347128   | C : T | 0.458 | 8.91E-09 <sup>a</sup> |                  |                       | 0.89 (0.85-0.92)  | 6.74E-10 <sup>a</sup> |  | Lung                            |
| rs27068 <sup>g</sup>       | 1347239   | C : T | 0.265 | 3.92E-10 <sup>a</sup> |                  |                       | 0.86 (0.83-0.90)  | 1.87E-11 <sup>a</sup> |  | Lung                            |
| rs37010 <sup>g</sup>       | 1349535   | A : G | 0.450 | 3.06E-09 <sup>a</sup> |                  |                       | 0.88 (0.85-0.92)  | 2.05E-10 <sup>a</sup> |  | Lung                            |
| rs37009 <sup>g</sup>       | 1350339   | C : T | 0.455 | 3.98E-09 <sup>a</sup> |                  |                       | 0.88 (0.85-0.92)  | 2.61E-10 <sup>a</sup> |  | Lung                            |
| rs40182 <sup>g</sup>       | 1350397   | G : A | 0.457 | 3.71E-09 <sup>a</sup> |                  |                       | 0.88 (0.85-0.92)  | 2.25E-10 <sup>a</sup> |  | Lung                            |
| rs37008 <sup>g</sup>       | 1351538   | G : A | 0.454 | 2.00E-09 <sup>a</sup> |                  |                       | 0.88 (0.85-0.92)  | 1.29E-10 <sup>a</sup> |  | Lung                            |
| rs40181 <sup>g</sup>       | 1354462   | G : T | 0.455 | 2.00E-10 <sup>a</sup> |                  |                       | 0.87 (0.84-0.91)  | 9.07E-12 <sup>a</sup> |  | Lung                            |
| rs37006 <sup>g</sup>       | 1355058   | C : T | 0.457 | 2.06E-10 <sup>a</sup> |                  |                       | 0.87 (0.84-0.91)  | 9.93E-12 <sup>a</sup> |  | Lung                            |
| rs37005 <sup>g</sup>       | 1356450   | C : T | 0.460 | 1.98E-10 <sup>a</sup> |                  |                       | 0.87 (0.84-0.91)  | 9.85E-12 <sup>a</sup> |  | Lung                            |
| rs37004 <sup>g</sup>       | 1356684   | C : T | 0.239 | 2.27E-11 <sup>a</sup> |                  |                       | 0.84 (0.81-0.88)  | 1.29E-12 <sup>a</sup> |  | Lung                            |
| rs37003 <sup>g</sup>       | 1356771   | A : C | 0.458 | 3.17E-10 <sup>a</sup> |                  |                       | 0.87 (0.84-0.91)  | 1.65E-11 <sup>a</sup> |  | Lung                            |
| rs115960372                | 1518494   | C : T | 0.104 | 6.94E-07 <sup>a</sup> | 1.19 (1.1-1.27)  | 2.97E-06 <sup>a</sup> | 0.90 (0.83-0.98)  | 1.29E-02              |  | Prostate<br>Lung                |
| rs12655062                 | 1890877   | G : A | 0.354 | 1.65E-06 <sup>a</sup> | 1.12 (1.06-1.18) | 3.53E-05              | 0.95 (0.92-0.98)  | 2.72E-03              |  | Prostate<br>Colorectal, Ovarian |
| rs4975759                  | 1892455   | A : G | 0.417 | 8.65E-06 <sup>a</sup> | 1.11 (1.06-1.17) | 2.22E-05              | 0.96 (0.93-0.995) | 2.53E-02 <sup>b</sup> |  | Prostate<br>Colorectal, Ovarian |
| rs34695572                 | 1892876   | G : A | 0.416 | 1.02E-05 <sup>a</sup> | 1.11 (1.06-1.17) | 3.03E-05              | 0.96 (0.93-0.994) | 2.21E-02 <sup>b</sup> |  | Prostate<br>Colorectal          |
| <i>POT1</i> (Chr. 7)       |           |       |       |                       |                  |                       |                   |                       |  |                                 |
| rs74986217                 | 123465182 | A : C | 0.041 | 2.54E-04 <sup>a</sup> | 1.31 (1.16-1.48) | 2.17E-05 <sup>a</sup> |                   |                       |  | Ovarian                         |
| rs116895242                | 123946403 | T : A | 0.041 | 5.21E-05              |                  |                       | 0.83 (0.77-0.90)  | 6.99E-06 <sup>a</sup> |  | Colorectal, Ovarian, Lung       |
| <i>TERF2</i> (Chr. 16)     |           |       |       |                       |                  |                       |                   |                       |  |                                 |
| rs117496043 <sup>f</sup>   | 69590365  | C : T | 0.003 | 4.28E-05              | 1.66 (1.33-2.06) | 6.14E-06 <sup>a</sup> |                   |                       |  | Prostate                        |
| <i>RTEL1</i> (Chr. 20)     |           |       |       |                       |                  |                       |                   |                       |  |                                 |
| rs114220381 <sup>f</sup>   | 61477960  | T : A | 0.048 | 1.21E-04              | 1.31 (1.16-1.48) | 1.13E-05 <sup>a</sup> |                   |                       |  | Prostate                        |
| rs34835912 <sup>c</sup>    | 62256843  | G : A | 0.015 | 4.28E-05              |                  |                       | 0.66 (0.54-0.79)  | 1.09E-05 <sup>a</sup> |  | Prostate                        |
| rs34978822 <sup>f</sup>    | 62291599  | C : G | 0.015 | 2.14E-05              |                  |                       | 0.71 (0.62-0.82)  | 3.17E-06 <sup>a</sup> |  | Prostate, Lung                  |
| rs35640778 <sup>g</sup>    | 62321128  | G : A | 0.013 | 5.02E-05              |                  |                       | 0.76 (0.68-0.86)  | 7.86E-06 <sup>a</sup> |  | Prostate, Ovarian, Lung         |
| rs34507260                 | 62353508  | A : G | 0.011 | 3.85E-05              |                  |                       | 0.76 (0.67-0.85)  | 5.97E-06 <sup>a</sup> |  | Prostate, Ovarian, Lung         |
| rs147892781 <sup>c,d</sup> | 62956822  | G : A | 0.070 | 1.63E-04              |                  |                       | 0.72 (0.62-0.83)  | 1.34E-05 <sup>a</sup> |  | Prostate                        |

Abbreviations: OR- odds ratio; CI- confidence interval; Ref- reference; SNP- single nucleotide polymorphism; Chr.- chromosome.

<sup>a</sup> Gene level P-value thresholds based on the number of effective tests are: *DCLER1B* P-value<2.65x10<sup>-5</sup>; *TERC* P-value<2.45x10<sup>-5</sup>; *GARI* P-value<2.44x10<sup>-5</sup>; *TERT-CLPTM1* P-value<1.32x10<sup>-5</sup>; *POT1* P-value<2.94x10<sup>-5</sup>; *TERF2* P-value<3.08x10<sup>-5</sup>; *RTEL1* P-value<1.86x10<sup>-5</sup>.

<sup>b</sup> Positive or inversely associations with P-values between 0.01 and 0.05 are considered to be suggestive.

<sup>c</sup> SNPs that are missing from reference (CGEMS and EAGLE) panel dataset.

<sup>d</sup> ASSET meta-analytic results for these SNPs are based on 2 cancer types rather than all 5 studies.

<sup>e</sup> ASSET meta-analytic results for these SNPs are based on 3 cancer types rather than all 5 studies.

<sup>f</sup> ASSET meta-analytic results for these SNPs are based on 4 cancer types rather than all 5 studies.

<sup>g</sup> SNPs that are directly measured and not imputed.

Supplementary Table 6.  $r^2$  and  $D'$  correlations between SNPs identified from unconditional and conditional ASSET analysis

| <b>DLER1B</b> | rs12144215  | rs974404    | rs2884603  |            |            |            |            |            |            |            |            |            |            |            |            |            |           |            |            |         |         |             |            |   |
|---------------|-------------|-------------|------------|------------|------------|------------|------------|------------|------------|------------|------------|------------|------------|------------|------------|------------|-----------|------------|------------|---------|---------|-------------|------------|---|
| rs12144215    | 1           | 0.975       | 0.826      |            |            |            |            |            |            |            |            |            |            |            |            |            |           |            |            |         |         |             |            |   |
| rs974404      | 0.208       | 1           | 0.885      |            |            |            |            |            |            |            |            |            |            |            |            |            |           |            |            |         |         |             |            |   |
| rs525862      | 0.209       | 0.559       | 1          |            |            |            |            |            |            |            |            |            |            |            |            |            |           |            |            |         |         |             |            |   |
| <b>TEBC</b>   | rs75316749  | rs9809168   | rs74677551 | rs77964281 | rs71277158 | rs75313056 | rs2901621  | rs75982374 | rs76925190 | rs80304993 | rs12487040 | rs62293480 | rs59758024 | rs55953261 | rs77085460 | rs10804842 | rs9865021 | rs10936633 | rs969217   |         |         |             |            |   |
| rs75316749    | 1           | 0.868       | 0.888      | 0.040      | 0.067      | 0.036      | 0.104      | 0.056      | 0.067      | 0.013      | 0.003      | 0.035      | 0.156      | 0.065      | 0.033      | 0.050      | 0.172     | 0.109      | 0.059      |         |         |             |            |   |
| rs9809168     | 0.492       | 1           | 0.743      | 0.028      | 0.031      | 0.027      | 0.038      | 0.006      | 0.031      | 0.085      | 0.105      | 0.035      | 0.067      | 0.056      | 0.611      | 0.034      | 0.149     | 0.113      | 0.053      |         |         |             |            |   |
| rs74677551    | 0.528       | 0.540       | 1          | 0.029      | 0.047      | 0.037      | 0.048      | 0.041      | 0.046      | 0.171      | 0.051      | 0.053      | 0.000      | 0.042      | 0.421      | 0.002      | 0.088     | 0.130      | 0.063      |         |         |             |            |   |
| rs77964281    | 0.001       | 0.000       | 0.000      | 1          | 0.891      | 0.908      | 0.828      | 0.540      | 0.699      | 0.679      | 0.691      | 0.557      | 0.770      | 0.338      | 0.725      | 0.648      | 0.755     | 0.464      | 0.656      |         |         |             |            |   |
| rs71277158    | 0.001       | 0.000       | 0.000      | 0.649      | 1          | 0.994      | 0.933      | 0.829      | 0.812      | 0.793      | 0.791      | 0.603      | 0.849      | 0.378      | 0.801      | 0.757      | 0.817     | 0.495      | 0.716      |         |         |             |            |   |
| rs75313056    | 0.001       | 0.000       | 0.000      | 0.511      | 0.500      | 1          | 0.944      | 0.823      | 0.816      | 0.776      | 0.728      | 0.516      | 0.791      | 0.324      | 0.788      | 0.751      | 0.780     | 0.445      | 0.683      |         |         |             |            |   |
| rs2901621     | 0.001       | 0.000       | 0.000      | 0.180      | 0.280      | 0.145      | 1          | 0.967      | 0.878      | 0.746      | 0.700      | 0.472      | 0.739      | 0.309      | 0.933      | 0.802      | 0.717     | 0.332      | 0.613      |         |         |             |            |   |
| rs75982374    | 0.001       | 0.000       | 0.000      | 0.270      | 0.517      | 0.455      | 0.226      | 1          | 1.000      | 0.975      | 0.973      | 0.937      | 0.961      | 0.405      | 0.970      | 0.926      | 0.929     | 0.565      | 0.887      |         |         |             |            |   |
| rs76925190    | 0.001       | 0.000       | 0.000      | 0.374      | 0.618      | 0.316      | 0.265      | 0.706      | 1          | 0.981      | 0.981      | 0.957      | 0.973      | 0.417      | 0.982      | 0.929      | 0.926     | 0.563      | 0.877      |         |         |             |            |   |
| rs80304993    | 0.000       | 0.000       | 0.000      | 0.243      | 0.407      | 0.197      | 0.277      | 0.462      | 0.664      | 1          | 1.000      | 0.977      | 0.995      | 0.394      | 0.994      | 0.873      | 0.827     | 0.506      | 0.336      |         |         |             |            |   |
| rs12487040    | 0.000       | 0.000       | 0.000      | 0.134      | 0.215      | 0.092      | 0.457      | 0.245      | 0.353      | 0.533      | 1          | 0.958      | 0.939      | 0.458      | 0.996      | 0.994      | 0.812     | 0.376      | 0.690      |         |         |             |            |   |
| rs62293480    | 0.000       | 0.000       | 0.000      | 0.013      | 0.019      | 0.007      | 0.036      | 0.035      | 0.051      | 0.078      | 0.140      | 1          | 0.993      | 0.293      | 1.000      | 0.917      | 0.740     | 0.319      | 0.417      |         |         |             |            |   |
| rs59758024    | 0.001       | 0.000       | 0.000      | 0.074      | 0.110      | 0.048      | 0.260      | 0.106      | 0.154      | 0.234      | 0.391      | 0.174      | 1          | 0.674      | 1.000      | 0.965      | 0.923     | 0.585      | 0.854      |         |         |             |            |   |
| rs55953261    | 0.000       | 0.000       | 0.000      | 0.018      | 0.028      | 0.010      | 0.058      | 0.024      | 0.036      | 0.047      | 0.119      | 0.019      | 0.356      | 1          | 0.403      | 0.464      | 0.612     | 0.196      | 0.343      |         |         |             |            |   |
| rs77085460    | 0.000       | 0.001       | 0.000      | 0.205      | 0.205      | 0.392      | 0.089      | 0.399      | 0.289      | 0.204      | 0.109      | 0.107      | 0.049      | 0.010      | 1          | 0.997      | 0.992     | 0.452      | 0.968      |         |         |             |            |   |
| rs10804842    | 0.000       | 0.000       | 0.000      | 0.199      | 0.333      | 0.166      | 0.355      | 0.376      | 0.537      | 0.686      | 0.527      | 0.076      | 0.244      | 0.072      | 0.185      | 1          | 0.994     | 0.418      | 0.758      |         |         |             |            |   |
| rs9865021     | 0.001       | 0.001       | 0.000      | 0.079      | 0.113      | 0.052      | 0.271      | 0.110      | 0.155      | 0.179      | 0.325      | 0.107      | 0.768      | 0.326      | 0.053      | 0.288      | 1         | 0.652      | 0.914      |         |         |             |            |   |
| rs10936633    | 0.001       | 0.000       | 0.001      | 0.033      | 0.046      | 0.019      | 0.064      | 0.045      | 0.063      | 0.074      | 0.077      | 0.022      | 0.278      | 0.031      | 0.012      | 0.056      | 0.384     | 1          | 0.617      |         |         |             |            |   |
| rs969217      | 0.000       | 0.000       | 0.000      | 0.117      | 0.170      | 0.078      | 0.364      | 0.197      | 0.272      | 0.809      | 0.459      | 0.027      | 0.335      | 0.069      | 0.099      | 0.327      | 0.427     | 0.215      | 1          |         |         |             |            |   |
| <b>TEBT</b>   | rs6861230   | rs33961405  | rs7725218  | rs7713218  | rs7717443  | rs35029535 | rs10866498 | rs2736100  | rs2853677  | rs2736099  | rs2736098  | rs2735940  | rs2736109  | rs2735948  | rs2735944  | rs35953391 | rs3816659 | rs36019446 | rs55901723 | rs37005 | rs37004 | rs115960372 | rs12655062 |   |
| rs6861230     | 1           | 0.032       | 0.007      | 0.065      | 0.015      | 0.051      | 0.008      | 0.028      | 0.100      | 0.048      | 0.033      | 0.029      | 0.001      | 0.004      | 0.081      | 0.000      | 0.007     | 0.022      | 0.191      | 0.052   | 0.096   | 0.036       | 0.038      |   |
| rs33961405    | 0.000       | 1           | 0.684      | 0.537      | 0.012      | 0.510      | 0.319      | 0.460      | 0.515      | 0.500      | 0.341      | 0.504      | 0.163      | 0.085      | 0.484      | 0.540      | 0.111     | 0.041      | 0.382      | 0.107   | 0.549   | 0.063       | 0.001      |   |
| rs7725218     | 0.000       | 0.299       | 1          | 0.997      | 0.145      | 0.995      | 0.627      | 0.612      | 0.536      | 0.493      | 0.171      | 0.676      | 0.020      | 0.022      | 0.439      | 0.537      | 0.071     | 0.021      | 0.270      | 0.058   | 0.523   | 0.179       | 0.040      |   |
| rs7713218     | 0.000       | 0.285       | 0.644      | 1          | 0.298      | 0.996      | 0.671      | 0.482      | 0.504      | 0.535      | 0.170      | 0.523      | 0.007      | 0.017      | 0.529      | 0.199      | 0.026     | 0.029      | 0.119      | 0.020   | 0.243   | 0.115       | 0.016      |   |
| rs7717443     | 0.000       | 0.000       | 0.014      | 0.088      | 1          | 0.089      | 0.654      | 0.488      | 0.021      | 0.016      | 0.034      | 0.003      | 0.062      | 0.032      | 0.095      | 0.108      | 0.047     | 0.037      | 0.095      | 0.037   | 0.084   | 0.057       | 0.026      |   |
| rs35029535    | 0.000       | 0.153       | 0.373      | 0.578      | 0.005      | 1          | 0.620      | 0.325      | 0.403      | 0.433      | 0.034      | 0.389      | 0.289      | 0.204      | 0.606      | 0.325      | 0.140     | 0.063      | 0.060      | 0.150   | 0.352   | 0.138       | 0.003      |   |
| rs10866498    | 0.000       | 0.096       | 0.237      | 0.420      | 0.419      | 0.240      | 1          | 0.709      | 0.290      | 0.271      | 0.075      | 0.281      | 0.028      | 0.014      | 0.255      | 0.102      | 0.011     | 0.035      | 0.024      | 0.015   | 0.115   | 0.139       | 0.005      |   |
| rs2736100     | 0.000       | 0.190       | 0.215      | 0.206      | 0.231      | 0.069      | 0.477      | 1          | 0.556      | 0.570      | 0.326      | 0.484      | 0.171      | 0.069      | 0.294      | 0.327      | 0.087     | 0.007      | 0.146      | 0.079   | 0.311   | 0.152       | 0.034      |   |
| rs2853677     | 0.001       | 0.230       | 0.212      | 0.223      | 0.000      | 0.083      | 0.069      | 0.240      | 1          | 0.837      | 0.683      | 0.922      | 0.368      | 0.251      | 0.919      | 0.877      | 0.294     | 0.033      | 0.403      | 0.249   | 0.817   | 0.163       | 0.011      |   |
| rs2736099     | 0.000       | 0.158       | 0.240      | 0.183      | 0.000      | 0.070      | 0.044      | 0.184      | 0.511      | 1          | 0.685      | 0.933      | 0.351      | 0.276      | 0.915      | 0.876      | 0.330     | 0.113      | 0.522      | 0.293   | 0.811   | 0.257       | 0.048      |   |
| rs2736098     | 0.000       | 0.047       | 0.019      | 0.012      | 0.000      | 0.000      | 0.002      | 0.038      | 0.217      | 0.300      | 1          | 0.999      | 0.927      | 0.853      | 0.953      | 0.948      | 0.862     | 0.335      | 0.907      | 0.757   | 0.923   | 0.151       | 0.076      |   |
| rs2735940     | 0.000       | 0.213       | 0.245      | 0.234      | 0.000      | 0.106      | 0.070      | 0.219      | 0.618      | 0.462      | 0.338      | 1          | 0.521      | 0.262      | 0.957      | 0.945      | 0.330     | 0.057      | 0.439      | 0.286   | 0.884   | 0.095       | 0.021      |   |
| rs2736109     | 0.000       | 0.019       | 0.000      | 0.000      | 0.002      | 0.035      | 0.001      | 0.019      | 0.110      | 0.110      | 0.491      | 0.161      | 1          | 0.893      | 0.979      | 0.965      | 0.843     | 0.399      | 0.896      | 0.753   | 0.907   | 0.280       | 0.054      |   |
| rs2735948     | 0.000       | 0.005       | 0.000      | 0.000      | 0.001      | 0.035      | 0.000      | 0.004      | 0.038      | 0.034      | 0.205      | 0.057      | 0.395      | 1          | 0.958      | 0.777      | 0.782     | 0.505      | 0.570      | 0.813   | 0.760   | 0.140       | 0.037      |   |
| rs2735944     | 0.000       | 0.038       | 0.020      | 0.045      | 0.002      | 0.101      | 0.011      | 0.016      | 0.119      | 0.086      | 0.060      | 0.178      | 0.111      | 0.214      | 1          | 0.997      | 0.998     | 0.446      | 0.325      | 0.963   | 0.952   | 0.024       | 0.034      |   |
| rs35953391    | 0.000       | 0.075       | 0.047      | 0.010      | 0.003      | 0.046      | 0.003      | 0.031      | 0.171      | 0.124      | 0.093      | 0.272      | 0.168      | 0.221      | 0.633      | 1          | 0.998     | 0.453      | 0.558      | 0.961   | 0.940   | 0.007       | 0.028      |   |
| rs3816659     | 0.000       | 0.009       | 0.002      | 0.001      | 0.002      | 0.016      | 0.000      | 0.006      | 0.053      | 0.049      | 0.212      | 0.092      | 0.355      | 0.604      | 0.230      | 0.360      | 1         | 0.588      | 0.758      | 0.959   | 0.959   | 0.149       | 0.040      |   |
| rs36019446    | 0.000       | 0.002       | 0.000      | 0.001      | 0.001      | 0.002      | 0.001      | 0.000      | 0.001      | 0.008      | 0.047      | 0.003      | 0.117      | 0.171      | 0.031      | 0.050      | 0.234     | 1          | 0.499      | 0.584   | 0.461   | 0.075       | 0.018      |   |
| rs55901723    | 0.000       | 0.026       | 0.008      | 0.003      | 0.002      | 0.001      | 0.000      | 0.004      | 0.025      | 0.031      | 0.060      | 0.041      | 0.102      | 0.084      | 0.096      | 0.219      | 0.146     | 0.043      | 1          | 0.755   | 0.586   | 0.257       | 0.058      |   |
| rs37005       | 0.000       | 0.009       | 0.002      | 0.000      | 0.001      | 0.017      | 0.000      | 0.005      | 0.041      | 0.042      | 0.178      | 0.075      | 0.308      | 0.601      | 0.196      | 0.307      | 0.845     | 0.252      | 0.133      | 1       | 0.992   | 0.120       | 0.040      |   |
| rs37004       | 0.000       | 0.090       | 0.052      | 0.017      | 0.002      | 0.063      | 0.004      | 0.032      | 0.173      | 0.124      | 0.103      | 0.278      | 0.174      | 0.247      | 0.494      | 0.757      | 0.388     | 0.061      | 0.206      | 0.382   | 1       | 0.099       | 0.023      |   |
| rs115960372   | 0.001       | 0.000       | 0.002      | 0.001      | 0.000      | 0.003      | 0.002      | 0.003      | 0.002      | 0.004      | 0.001      | 0.001      | 0.006      | 0.003      | 0.000      | 0.000      | 0.000     | 0.000      | 0.001      | 0.001   | 0.002   | 0.000       | 1          |   |
| rs12655062    | 0.000       | 0.000       | 0.001      | 0.000      | 0.000      | 0.000      | 0.000      | 0.001      | 0.000      | 0.001      | 0.001      | 0.000      | 0.001      | 0.001      | 0.000      | 0.000      | 0.000     | 0.001      | 0.001      | 0.001   | 0.000   | 0.001       | 0.001      | 1 |
| <b>POT1</b>   | rs74986217  | rs116895242 |            |            |            |            |            |            |            |            |            |            |            |            |            |            |           |            |            |         |         |             |            |   |
| rs74986217    | 1           | 0.007       |            |            |            |            |            |            |            |            |            |            |            |            |            |            |           |            |            |         |         |             |            |   |
| rs116895242   | 0.000       | 1           |            |            |            |            |            |            |            |            |            |            |            |            |            |            |           |            |            |         |         |             |            |   |
| <b>RTEL1</b>  | rs114220581 | rs34978822  |            |            |            |            |            |            |            |            |            |            |            |            |            |            |           |            |            |         |         |             |            |   |
| rs114220581   | 1           | 0.031       |            |            |            |            |            |            |            |            |            |            |            |            |            |            |           |            |            |         |         |             |            |   |
| rs34978822    | 0.001       | 1           |            |            |            |            |            |            |            |            |            |            |            |            |            |            |           |            |            |         |         |             |            |   |

$D'$  values are highlighted in gray and presented in the upper half of the matrix.

$r^2$  values are listed in the lower half portion of the matrix

Supplementary Table 7. Correlated SNPs ( $r^2 > 0.70$ ) among statistically significant unconditional ASSET variants

| Telomere Gene<br>Region<br>Examined | Independent SNP (position) | Correlated SNP | SNP position | $r^2$ | Actual Gene That Correlated SNP<br>Lies or Distance (kb) from<br>Transcription Start or Stop Site |
|-------------------------------------|----------------------------|----------------|--------------|-------|---------------------------------------------------------------------------------------------------|
| <i>DCLRE1B</i>                      | rs12144215 (114187155)     |                |              |       |                                                                                                   |
|                                     |                            | rs12144215     | 114187155    | 1.000 | <i>MAGI3</i>                                                                                      |
|                                     |                            | rs17359281     | 114185959    | 1.000 | <i>MAGI3</i>                                                                                      |
|                                     |                            | rs192524208    | 114166133    | 1.000 | <i>MAGI3</i>                                                                                      |
|                                     |                            | rs76726048     | 114206699    | 1.000 | <i>MAGI3</i>                                                                                      |
|                                     |                            | rs79220465     | 114171341    | 1.000 | <i>MAGI3</i>                                                                                      |
|                                     |                            | rs79667495     | 114191329    | 1.000 | <i>MAGI3</i>                                                                                      |
|                                     |                            | rs2146018      | 114195330    | 0.999 | <i>MAGI3</i>                                                                                      |
|                                     |                            | rs3761934      | 114189067    | 0.999 | <i>MAGI3</i>                                                                                      |
|                                     |                            | rs41352847     | 114189880    | 0.999 | <i>MAGI3</i>                                                                                      |
|                                     |                            | rs4838993      | 114135133    | 0.999 | <i>MAGI3</i>                                                                                      |
|                                     |                            | rs4839329      | 114135705    | 0.999 | <i>MAGI3</i>                                                                                      |
|                                     |                            | rs75374178     | 114181948    | 0.999 | <i>MAGI3</i>                                                                                      |
|                                     |                            | rs76308249     | 114147681    | 0.999 | <i>MAGI3</i>                                                                                      |
|                                     |                            | rs78703286     | 114148115    | 0.999 | <i>MAGI3</i>                                                                                      |
|                                     |                            | rs146441240    | 114179903    | 0.998 | <i>MAGI3</i>                                                                                      |
|                                     |                            | rs147272614    | 114143966    | 0.998 | <i>MAGI3</i>                                                                                      |
|                                     |                            | rs17274627     | 114217395    | 0.998 | <i>MAGI3</i>                                                                                      |
|                                     |                            | rs17359378     | 114216709    | 0.998 | <i>MAGI3</i>                                                                                      |
|                                     |                            | rs4838994      | 114151606    | 0.998 | <i>MAGI3</i>                                                                                      |
|                                     |                            | rs75419513     | 114132796    | 0.998 | <i>MAGI3</i>                                                                                      |
|                                     |                            | rs80348557     | 114151116    | 0.998 | <i>MAGI3</i>                                                                                      |
|                                     |                            | rs111408799    | 114153375    | 0.998 | <i>MAGI3</i>                                                                                      |
|                                     |                            | rs4839331      | 114161631    | 0.997 | <i>MAGI3</i>                                                                                      |
|                                     |                            | rs76617814     | 114171234    | 0.997 | <i>MAGI3</i>                                                                                      |
|                                     |                            | rs77042378     | 114209101    | 0.997 | <i>MAGI3</i>                                                                                      |
|                                     |                            | rs6678422      | 114204700    | 0.996 | <i>MAGI3</i>                                                                                      |
|                                     |                            | rs4839332      | 114162191    | 0.995 | <i>MAGI3</i>                                                                                      |
|                                     |                            | rs4839336      | 114234145    | 0.994 | 214kb 3' of <i>DCLRE1B</i>                                                                        |
|                                     |                            | rs74524050     | 114231207    | 0.994 | 217kb 3' of <i>DCLRE1B</i>                                                                        |
|                                     |                            | rs77551704     | 114235186    | 0.994 | 212kb 3' of <i>DCLRE1B</i>                                                                        |
|                                     |                            | rs77892281     | 114163617    | 0.993 | <i>MAGI3</i>                                                                                      |
|                                     |                            | rs76038270     | 114238920    | 0.991 | 209kb 3' of <i>DCLRE1B</i>                                                                        |
|                                     |                            | rs78874053     | 114242873    | 0.985 | <i>PHTF1</i>                                                                                      |
|                                     |                            | rs17031795     | 114255828    | 0.984 | <i>PHTF1</i>                                                                                      |
|                                     |                            | rs4589108      | 114259625    | 0.984 | <i>PHTF1</i>                                                                                      |
|                                     |                            | rs4839341      | 114271662    | 0.984 | <i>PHTF1</i>                                                                                      |
|                                     |                            | rs75564289     | 114255664    | 0.984 | <i>PHTF1</i>                                                                                      |
|                                     |                            | rs4393155      | 114274247    | 0.983 | <i>PHTF1</i>                                                                                      |
|                                     |                            | rs75290614     | 114242872    | 0.983 | <i>PHTF1</i>                                                                                      |
|                                     |                            | rs4839000      | 114280135    | 0.982 | <i>PHTF1</i>                                                                                      |
|                                     |                            | rs4839330      | 114137582    | 0.982 | <i>MAGI3</i>                                                                                      |
|                                     |                            | rs75296543     | 114138286    | 0.982 | <i>MAGI3</i>                                                                                      |
|                                     |                            | rs76112502     | 114149696    | 0.982 | <i>MAGI3</i>                                                                                      |
|                                     |                            | rs78394484     | 114282758    | 0.982 | <i>PHTF1</i>                                                                                      |
|                                     |                            | rs79198040     | 114288691    | 0.981 | <i>PHTF1</i>                                                                                      |
|                                     |                            | rs17359468     | 114242706    | 0.980 | <i>PHTF1</i>                                                                                      |
|                                     |                            | rs78483697     | 114276709    | 0.979 | <i>PHTF1</i>                                                                                      |
|                                     |                            | rs147962667    | 114116029    | 0.976 | <i>MAGI3</i>                                                                                      |



|                       |             |           |       |                                 |
|-----------------------|-------------|-----------|-------|---------------------------------|
|                       | rs76752412  | 114115827 | 0.971 | <i>MAGI3</i>                    |
|                       | rs113081027 | 114118802 | 0.970 | <i>MAGI3</i>                    |
|                       | rs114207498 | 114104354 | 0.967 | <i>MAGI3</i>                    |
|                       | rs4839327   | 114096499 | 0.966 | <i>MAGI3</i>                    |
|                       | rs75926636  | 114104765 | 0.965 | <i>MAGI3</i>                    |
|                       | rs116480529 | 114116744 | 0.959 | <i>MAGI3</i>                    |
|                       | rs75159321  | 114114947 | 0.953 | <i>MAGI3</i>                    |
|                       | rs150091562 | 114113597 | 0.952 | <i>MAGI3</i>                    |
|                       | rs74533448  | 114292888 | 0.950 | <i>PHTF1</i>                    |
|                       | rs74610368  | 114285303 | 0.950 | <i>PHTF1</i>                    |
|                       | rs7514649   | 114079822 | 0.949 | <i>MAGI3</i>                    |
|                       | rs75746385  | 114300892 | 0.946 | <i>PHTF1</i>                    |
|                       | rs17508449  | 114085145 | 0.931 | <i>MAGI3</i>                    |
|                       | rs79381435  | 114085676 | 0.929 | <i>MAGI3</i>                    |
|                       | rs78552134  | 114269666 | 0.928 | <i>PHTF1</i>                    |
|                       | rs17461918  | 114081444 | 0.924 | <i>MAGI3</i>                    |
|                       | rs4839333   | 114219161 | 0.887 | <i>MAGI3</i>                    |
|                       | rs112390378 | 114298509 | 0.860 | <i>PHTF1</i>                    |
| rs974404 (114382025)  |             |           |       |                                 |
|                       | rs974404    | 114382025 | 1.000 | <i>AP4B1-AS1, PTPN22</i>        |
|                       | rs1217378   | 114345418 | 0.999 | <i>RSBN1</i>                    |
|                       | rs1217405   | 114392632 | 0.999 | <i>AP4B1-AS1, PTPN22</i>        |
|                       | rs1217406   | 114393153 | 0.999 | <i>AP4B1-AS1, AP4B1</i>         |
|                       | rs1217411   | 114356125 | 0.999 | <i>AP4B1-AS1, PTPN22, RSBN1</i> |
|                       | rs1310182   | 114373503 | 0.999 | <i>AP4B1-AS1, PTPN22</i>        |
|                       | rs1217379   | 114344083 | 0.998 | <i>RSBN1</i>                    |
|                       | rs1217418   | 114401231 | 0.996 | <i>AP4B1-AS1, PTPN22</i>        |
|                       | rs1217419   | 114401904 | 0.996 | <i>AP4B1-AS1, PTPN22</i>        |
|                       | rs1217420   | 114402751 | 0.996 | <i>AP4B1-AS1, PTPN22</i>        |
|                       | rs1217385   | 114418205 | 0.940 | <i>AP4B1-AS1</i>                |
|                       | rs6665194   | 114417843 | 0.936 | <i>AP4B1-AS1</i>                |
| rs7523862 (114443419) |             |           |       |                                 |
|                       | rs7523862   | 114443419 | 1.000 | <i>AP4B1-AS1, AP4B1</i>         |
|                       | rs3789613   | 114443035 | 1.000 | <i>AP4B1-AS1, AP4B1</i>         |
|                       | rs10858022  | 114446341 | 0.999 | <i>AP4B1, DCLRE1B</i>           |
|                       | rs6661817   | 114447034 | 0.998 | <i>AP4B1, DCLRE1B</i>           |
|                       | rs10776775  | 114436482 | 0.997 | <i>AP4B1-AS1, AP4B1</i>         |
|                       | rs10745340  | 114436970 | 0.995 | <i>AP4B1-AS1, AP4B1</i>         |
|                       | rs2884603   | 114427450 | 0.995 | <i>AP4B1-AS1, BCL2L15</i>       |
|                       | rs7524200   | 114426824 | 0.995 | <i>AP4B1-AS1, BCL2L15</i>       |
|                       | rs1217392   | 114433970 | 0.994 | <i>AP4B1-AS1</i>                |

---

**TERC**

|                        |             |           |       |                         |
|------------------------|-------------|-----------|-------|-------------------------|
| rs75316749 (168761423) |             |           |       |                         |
|                        | rs75316749  | 168761423 | 1.000 | 721kb 3' of <i>TERC</i> |
|                        | rs115002293 | 168759557 | 0.991 | 723kb 3' of <i>TERC</i> |
|                        | rs41521447  | 168752932 | 0.991 | 723kb 3' of <i>TERC</i> |
|                        | rs149662262 | 168766924 | 0.988 | 715kb 3' of <i>TERC</i> |
|                        | rs75963875  | 168760144 | 0.986 | 722kb 3' of <i>TERC</i> |
|                        | rs79788196  | 168742937 | 0.979 | 739kb 3' of <i>TERC</i> |
| rs9809168 (168803900)  |             |           |       |                         |
|                        | rs9809168   | 168803900 | 1.000 | <i>MECOM</i>            |
|                        | rs9826964   | 168807413 | 0.969 | <i>MECOM</i>            |
|                        | rs9809633   | 168804217 | 0.790 | <i>MECOM</i>            |
| rs74677551 (168861788) |             |           |       |                         |
|                        | rs74677551  | 168861788 | 1.000 | <i>MECOM</i>            |
|                        | rs1488099   | 168860991 | 1.000 | <i>MECOM</i>            |

|                        |             |           |       |                           |
|------------------------|-------------|-----------|-------|---------------------------|
|                        | rs16853245  | 168862731 | 1.000 | <i>MECOM</i>              |
|                        | rs16853073  | 168774723 | 0.738 | 708kb 3' of <i>TERC</i>   |
|                        | rs77194710  | 168769537 | 0.738 | 713kb 3' of <i>TERC</i>   |
|                        | rs76488289  | 168764394 | 0.734 | 718kb 3' of <i>TERC</i>   |
|                        | rs79934920  | 168761663 | 0.734 | 721kb 3' of <i>TERC</i>   |
|                        | rs78325057  | 168749123 | 0.732 | 733kb 3' of <i>TERC</i>   |
|                        | rs10513655  | 168747022 | 0.725 | 735kb 3' of <i>TERC</i>   |
|                        | rs117527757 | 168743017 | 0.725 | 739kb 3' of <i>TERC</i>   |
|                        | rs74329725  | 168747355 | 0.725 | 735kb 3' of <i>TERC</i>   |
|                        | rs16853003  | 168736130 | 0.722 | 746kb 3' of <i>TERC</i>   |
|                        | rs75835734  | 168720540 | 0.719 | <i>LOC105374201</i>       |
| rs77964281 (169916180) | rs77964281  | 169916180 | 1.000 | 433kb 5' of <i>TERC</i>   |
|                        | rs113351200 | 169915772 | 0.983 | 433kb 5' of <i>TERC</i>   |
|                        | rs12493954  | 169909941 | 0.981 | 427kb 5' of <i>TERC</i>   |
|                        | rs6762609   | 169916919 | 0.981 | 434kb 5' of <i>TERC</i>   |
|                        | rs77216745  | 169913020 | 0.979 | 430kb 5' of <i>TERC</i>   |
|                        | rs76336713  | 169911957 | 0.978 | 429kb 5' of <i>TERC</i>   |
|                        | rs9757709   | 169906407 | 0.969 | 424kb 5' of <i>TERC</i>   |
|                        | rs77248289  | 169905625 | 0.968 | 423kb 5' of <i>TERC</i>   |
|                        | rs112269654 | 169903667 | 0.967 | 421kb 5' of <i>TERC</i>   |
|                        | rs113438612 | 169901726 | 0.952 | 419kb 5' of <i>TERC</i>   |
|                        | rs12488988  | 169879860 | 0.948 | <i>PHC3</i>               |
|                        | rs16854875  | 169899667 | 0.948 | <i>PHC3</i>               |
|                        | rs3772186   | 169889331 | 0.948 | <i>PHC3</i>               |
|                        | rs6763396   | 169876765 | 0.948 | <i>PHC3</i>               |
|                        | rs73879182  | 169879695 | 0.948 | <i>PHC3</i>               |
|                        | rs74643988  | 169883365 | 0.948 | <i>PHC3</i>               |
|                        | rs76146702  | 169868720 | 0.948 | <i>PHC3</i>               |
|                        | rs79389383  | 169858228 | 0.948 | <i>PHC3</i>               |
|                        | rs79518241  | 169890738 | 0.948 | <i>PHC3</i>               |
|                        | rs12492606  | 169808354 | 0.947 | <i>PHC3</i>               |
|                        | rs17236830  | 169891246 | 0.947 | <i>PHC3</i>               |
|                        | rs2241292   | 169798962 | 0.947 | <i>GPR160</i>             |
|                        | rs58417766  | 169833247 | 0.947 | <i>LOC105374209, PHC3</i> |
|                        | rs6781454   | 169823096 | 0.947 | <i>LOC105374209, PHC3</i> |
|                        | rs6786022   | 169864154 | 0.947 | <i>PHC3</i>               |
|                        | rs6808506   | 169839239 | 0.947 | <i>LOC105374209, PHC3</i> |
|                        | rs6809214   | 169864096 | 0.947 | <i>PHC3</i>               |
|                        | rs73879173  | 169845604 | 0.947 | <i>PHC3</i>               |
|                        | rs73879178  | 169872834 | 0.947 | <i>PHC3</i>               |
|                        | rs7615039   | 169806170 | 0.947 | <i>PHC3</i>               |
|                        | rs7618919   | 169860239 | 0.947 | <i>PHC3</i>               |
|                        | rs16854836  | 169804730 | 0.946 | <i>PHC3</i>               |
|                        | rs6785202   | 169830459 | 0.946 | <i>LOC105374209, PHC3</i> |
|                        | rs73030653  | 169841926 | 0.946 | <i>PHC3</i>               |
|                        | rs7638400   | 169837787 | 0.946 | <i>LOC105374209, PHC3</i> |
|                        | rs879161    | 169812115 | 0.946 | <i>PHC3</i>               |
|                        | rs12493804  | 169799704 | 0.945 | <i>GPR160</i>             |
|                        | rs56241439  | 169830174 | 0.945 | <i>LOC105374209, PHC3</i> |
|                        | rs76646441  | 169885103 | 0.945 | <i>PHC3</i>               |
|                        | rs113687726 | 169867464 | 0.944 | <i>PHC3</i>               |
|                        | rs57150274  | 169874634 | 0.944 | <i>PHC3</i>               |
|                        | rs73879180  | 169874968 | 0.944 | <i>PHC3</i>               |
|                        | rs888507    | 169811039 | 0.943 | <i>PHC3</i>               |
|                        | rs12497114  | 169799521 | 0.942 | <i>GPR160</i>             |

|                        |             |           |       |                           |
|------------------------|-------------|-----------|-------|---------------------------|
|                        | rs61493476  | 169887831 | 0.940 | <i>PHC3</i>               |
|                        | rs80038349  | 169844718 | 0.939 | <i>PHC3</i>               |
|                        | rs16854848  | 169822201 | 0.935 | <i>LOC105374209, PHC3</i> |
|                        | rs76146592  | 169789234 | 0.911 | <i>GPR160</i>             |
|                        | rs2287478   | 169788105 | 0.907 | <i>GPR160</i>             |
|                        | rs2287479   | 169787423 | 0.901 | <i>GPR160</i>             |
|                        | rs2255256   | 169785903 | 0.891 | <i>GPR160</i>             |
|                        | rs56316750  | 169782754 | 0.878 | <i>GPR160</i>             |
|                        | rs17471922  | 169779394 | 0.860 | <i>GPR160</i>             |
|                        | rs73879167  | 169776194 | 0.804 | <i>GPR160</i>             |
|                        | rs113968946 | 169773657 | 0.803 | <i>GPR160</i>             |
|                        | rs73879163  | 169770802 | 0.803 | <i>GPR160</i>             |
|                        | rs16854812  | 169774383 | 0.802 | <i>GPR160</i>             |
|                        | rs2287482   | 169765795 | 0.802 | <i>GPR160</i>             |
|                        | rs7631178   | 169766424 | 0.802 | <i>GPR160</i>             |
|                        | rs7651554   | 169768485 | 0.802 | <i>GPR160</i>             |
|                        | rs11925129  | 169775228 | 0.799 | <i>GPR160</i>             |
|                        | rs73879164  | 169770924 | 0.798 | <i>GPR160</i>             |
|                        | rs3772178   | 169773833 | 0.796 | <i>GPR160</i>             |
|                        | rs60355509  | 169754180 | 0.790 | <i>GPR160</i>             |
|                        | rs2287483   | 169756846 | 0.789 | <i>GPR160</i>             |
|                        | rs111477446 | 169759112 | 0.788 | <i>GPR160</i>             |
|                        | rs59249820  | 169755545 | 0.784 | <i>GPR160</i>             |
|                        | rs73879159  | 169753747 | 0.761 | <i>GPR160</i>             |
|                        | rs2160902   | 169752927 | 0.736 | 270kb 5' of <i>TERC</i>   |
|                        | rs75286521  | 169748803 | 0.730 | 266kb 5' of <i>TERC</i>   |
|                        | rs111367602 | 169748004 | 0.728 | 265kb 5' of <i>TERC</i>   |
|                        | rs16854778  | 169748111 | 0.728 | 265kb 5' of <i>TERC</i>   |
| rs71277158 (169999216) | rs71277158  | 169999216 | 1.000 | <i>PRKCI</i>              |
|                        | rs56257047  | 169988286 | 0.994 | <i>PRKCI</i>              |
|                        | rs73879193  | 170018499 | 0.754 | <i>PRKCI</i>              |
| rs75313056 (170017609) | rs75313056  | 170017609 | 1.000 | <i>PRKCI</i>              |
|                        | rs77112641  | 169962533 | 0.940 | <i>PRKCI</i>              |
|                        | rs140861594 | 169971557 | 0.918 | <i>PRKCI</i>              |
| rs2901621 (170057704)  | rs2901621   | 170057704 | 1.000 | 575kb 5' of <i>TERC</i>   |
|                        | rs4955720   | 170028600 | 0.913 | 546kb 5' of <i>TERC</i>   |
|                        | rs6444914   | 170061756 | 0.707 | 579kb 5' of <i>TERC</i>   |
|                        | rs6444912   | 170061629 | 0.704 | 579kb 5' of <i>TERC</i>   |
| rs75982374 (170063227) | rs75982374  | 170063227 | 1.000 | 580kb 5' of <i>TERC</i>   |
|                        | rs148376875 | 170126707 | 0.871 | <i>LOC105374210</i>       |
| rs76925190 (170066339) | rs76925190  | 170066339 | 1.000 | 583kb 5' of <i>TERC</i>   |
|                        | rs78416326  | 170074517 | 0.868 | <i>SKIL</i>               |
|                        | 3:170092057 | 170092057 | 0.845 | <i>SKIL</i>               |
|                        | rs61436251  | 170083629 | 0.841 | <i>SKIL</i>               |
| rs80304993 (170097606) | rs80304993  | 170097606 | 1.000 | <i>SKIL</i>               |
| rs12487040 (170103592) | rs12487040  | 170103592 | 1.000 | <i>SKIL</i>               |
|                        | rs11720323  | 170104013 | 1.000 | <i>SKIL</i>               |
|                        | rs1045210   | 170114078 | 0.998 | <i>SKIL</i>               |
|                        | rs4582064   | 170095914 | 0.997 | <i>SKIL</i>               |

|                        |            |           |       |                             |
|------------------------|------------|-----------|-------|-----------------------------|
|                        | rs6768083  | 170120253 | 0.884 | 637kb 5' of <i>TERC</i>     |
|                        | rs12486850 | 170122676 | 0.882 | 640kb 5' of <i>TERC</i>     |
|                        | rs2421927  | 170121153 | 0.882 | 638kb 5' of <i>TERC</i>     |
|                        | rs6762828  | 170122872 | 0.882 | 640kb 5' of <i>TERC</i>     |
|                        | rs6444923  | 170122784 | 0.879 | 640kb 5' of <i>TERC</i>     |
|                        | rs6444924  | 170123048 | 0.879 | 640kb 5' of <i>TERC</i>     |
|                        | rs12488537 | 170124354 | 0.873 | 642kb 5' of <i>TERC</i>     |
|                        | rs12491115 | 170125604 | 0.873 | 643kb 5' of <i>TERC</i>     |
|                        | rs7644073  | 170126670 | 0.869 | <i>LOC105374210</i>         |
|                        | rs12634437 | 170126305 | 0.868 | 643kb 5' of <i>TERC</i>     |
|                        | rs13071543 | 170127919 | 0.862 | <i>LOC105374210</i>         |
|                        | rs62293498 | 170132824 | 0.827 | <i>LOC105374210</i>         |
|                        | rs35763188 | 170133401 | 0.824 | <i>LOC105374210</i>         |
|                        | rs62293497 | 170126565 | 0.805 | <i>LOC105374210</i>         |
|                        | rs13096001 | 170128750 | 0.796 | <i>LOC105374210</i>         |
|                        | rs62293499 | 170140153 | 0.778 | <i>CLDN11, MIR6828</i>      |
|                        | rs2422035  | 170145272 | 0.772 | <i>CLDN11</i>               |
|                        | rs6770844  | 170150812 | 0.766 | <i>CLDN11, LOC105374214</i> |
|                        | rs9815664  | 170069655 | 0.712 | 587kb 5' of <i>TERC</i>     |
| rs62293480 (170106672) |            |           |       |                             |
|                        | rs62293480 | 170106672 | 1.000 | <i>SKIL</i>                 |
| rs59758024 (170119352) |            |           |       |                             |
|                        | rs59758024 | 170119352 | 1.000 | 637kb 5' of <i>TERC</i>     |
|                        | rs62293481 | 170109434 | 0.910 | <i>SKIL</i>                 |
|                        | rs61212679 | 170098439 | 0.884 | <i>SKIL</i>                 |
|                        | rs10804839 | 170071783 | 0.796 | 589kb 5' of <i>TERC</i>     |
|                        | rs10804840 | 170071807 | 0.796 | 589kb 5' of <i>TERC</i>     |
|                        | rs17826519 | 170062936 | 0.732 | 580kb 5' of <i>TERC</i>     |
| rs55953261 (170121598) |            |           |       |                             |
|                        | rs55953261 | 170121598 | 1.000 | 639kb 5' of <i>TERC</i>     |
|                        | rs56121376 | 170123144 | 0.999 | 640kb 5' of <i>TERC</i>     |
|                        | rs10936632 | 170130102 | 0.969 | <i>LOC105374210</i>         |
| rs77085460 (170127536) |            |           |       |                             |
|                        | rs77085460 | 170127536 | 1.000 | <i>LOC105374210</i>         |
| rs10804842 (170135700) |            |           |       |                             |
|                        | rs10804842 | 170135700 | 1.000 | <i>CLDN11, LOC105374210</i> |
| rs9865021 (170146881)  |            |           |       |                             |
|                        | rs9865021  | 170146881 | 1.000 | <i>CLDN11</i>               |
|                        | rs6794467  | 170147991 | 0.997 | <i>CLDN11</i>               |
|                        | rs7610584  | 170153183 | 0.986 | <i>LOC105374214</i>         |
|                        | rs9811071  | 170156832 | 0.805 | <i>LOC105374214</i>         |
| rs10936633 (170158128) |            |           |       |                             |
|                        | rs10936633 | 170158128 | 1.000 | <i>LOC105374214</i>         |
| rs969217 (170159134)   |            |           |       |                             |
|                        | rs969217   | 170159134 | 1.000 | <i>LOC105374214</i>         |
|                        | rs1035298  | 170160493 | 0.913 | <i>LOC105374214</i>         |
| <b>GARI</b>            |            |           |       |                             |
| rs17042238 (111745854) |            |           |       |                             |
|                        | rs17042238 | 111745854 | 1.000 | 1000kb 5' of <i>GARI</i>    |
| <b>TERT-CLPTMIL</b>    |            |           |       |                             |
| rs6861230 (304003)     |            |           |       |                             |
|                        | rs6861230  | 304003    | 1.000 | <i>PDCD6</i>                |
| rs33961405 (1277577)   |            |           |       |                             |
|                        | rs33961405 | 1277577   | 1.000 | <i>TERT</i>                 |
| rs7725218 (1282414)    |            |           |       |                             |
|                        | rs7725218  | 1282414   | 1.000 | <i>TERT</i>                 |

|                      |             |         |       |                           |
|----------------------|-------------|---------|-------|---------------------------|
|                      | rs7726159   | 1282319 | 0.931 | <i>TERT</i>               |
|                      | rs4449583   | 1284135 | 0.909 | <i>TERT</i>               |
|                      | rs7705526   | 1285974 | 0.733 | <i>TERT</i>               |
| rs7713218 (1283312)  |             |         |       |                           |
|                      | rs7713218   | 1283312 | 1.000 | <i>TERT</i>               |
| rs7717443 (1283486)  |             |         |       |                           |
|                      | rs7717443   | 1283486 | 1.000 | <i>TERT</i>               |
| rs35029535 (1284976) |             |         |       |                           |
|                      | rs35029535  | 1284976 | 1.000 | <i>TERT</i>               |
| rs10866498 (1285162) |             |         |       |                           |
|                      | rs10866498  | 1285162 | 1.000 | <i>TERT</i>               |
| rs2736100 (1286516)  |             |         |       |                           |
|                      | rs2736100   | 1286516 | 1.000 | <i>TERT</i>               |
| rs2853677 (1287194)  |             |         |       |                           |
|                      | rs2853677   | 1287194 | 1.000 | <i>TERT</i>               |
| rs2736099 (1287340)  |             |         |       |                           |
|                      | rs2736099   | 1287340 | 1.000 | <i>TERT</i>               |
| rs2736098 (1294086)  |             |         |       |                           |
|                      | rs2736098   | 1294086 | 1.000 | <i>TERT</i>               |
|                      | rs2853669   | 1295349 | 0.812 | <i>TERT</i>               |
|                      | rs2736108   | 1297488 | 0.744 | 2kb 5' of <i>TERT</i>     |
| rs2735940 (1296486)  |             |         |       |                           |
|                      | rs2735940   | 1296486 | 1.000 | <i>TERT</i>               |
|                      | rs2853672   | 1292983 | 0.991 | <i>TERT</i>               |
| rs2736109 (1296759)  |             |         |       |                           |
|                      | rs2736109   | 1296759 | 1.000 | <i>TERT</i>               |
| rs2735948 (1299213)  |             |         |       |                           |
|                      | rs2735948   | 1299213 | 1.000 | 4kb 5' of <i>TERT</i>     |
| rs2735944 (1304432)  |             |         |       |                           |
|                      | rs2735944   | 1304432 | 1.000 | 9kb 5' of <i>TERT</i>     |
|                      | rs186156459 | 1307647 | 0.979 | 12kb 5' of <i>TERT</i>    |
|                      | rs2735947   | 1299392 | 0.775 | 4kb 5' of <i>TERT</i>     |
| rs35953391 (1312329) |             |         |       |                           |
|                      | rs35953391  | 1312329 | 1.000 | 6kb 3' of <i>CLPTMIL</i>  |
|                      | rs36115365  | 1313242 | 1.000 | 5kb 3' of <i>CLPTMIL</i>  |
|                      | rs7446461   | 1306521 | 0.88  | 11kb 3' of <i>CLPTMIL</i> |
|                      | rs4635969   | 1308552 | 0.76  | 9kb 3' of <i>CLPTMIL</i>  |
| rs3816659 (1317820)  |             |         |       |                           |
|                      | rs3816659   | 1317820 | 1.000 | <i>CLPTMIL</i>            |
|                      | rs383009    | 1327851 | 0.974 | <i>CLPTMIL</i>            |
|                      | rs414965    | 1324121 | 0.974 | <i>CLPTMIL</i>            |
|                      | rs381949    | 1322468 | 0.970 | <i>CLPTMIL</i>            |
|                      | rs111986123 | 1342157 | 0.963 | <i>CLPTMIL</i>            |
|                      | rs31489     | 1342714 | 0.956 | <i>CLPTMIL</i>            |
|                      | rs28379291  | 1313701 | 0.885 | 4kb 3' of <i>CLPTMIL</i>  |
|                      | rs10078017  | 1314009 | 0.884 | 4kb 3' of <i>CLPTMIL</i>  |
|                      | rs4975615   | 1315343 | 0.882 | 3kb 3' of <i>CLPTMIL</i>  |
|                      | rs6866783   | 1312020 | 0.879 | 6kb 3' of <i>CLPTMIL</i>  |
|                      | rs465498    | 1325803 | 0.865 | <i>CLPTMIL</i>            |
|                      | rs370348    | 1331219 | 0.863 | <i>CLPTMIL</i>            |
|                      | rs452384    | 1330840 | 0.863 | <i>CLPTMIL</i>            |
|                      | rs452932    | 1330253 | 0.863 | <i>CLPTMIL</i>            |
|                      | rs2447853   | 1333077 | 0.862 | <i>CLPTMIL</i>            |
|                      | rs455433    | 1336243 | 0.861 | <i>CLPTMIL</i>            |
|                      | rs460073    | 1336459 | 0.861 | <i>CLPTMIL</i>            |
|                      | rs13178866  | 1323212 | 0.858 | <i>CLPTMIL</i>            |

|                         |             |           |       |                           |
|-------------------------|-------------|-----------|-------|---------------------------|
|                         | rs421284    | 1325590   | 0.858 | <i>CLPTMIL</i>            |
|                         | rs456366    | 1337070   | 0.858 | <i>CLPTMIL</i>            |
|                         | rs467095    | 1336221   | 0.858 | <i>CLPTMIL</i>            |
|                         | rs421629    | 1320136   | 0.857 | <i>CLPTMIL</i>            |
|                         | rs380286    | 1320247   | 0.853 | <i>CLPTMIL</i>            |
|                         | rs401681    | 1322087   | 0.849 | <i>CLPTMIL</i>            |
|                         | rs31490     | 1344458   | 0.838 | <i>CLPTMIL</i>            |
|                         | rs61574973  | 1309168   | 0.804 | <i>MIR4457</i>            |
|                         | rs4404721   | 1306165   | 0.801 | 12kb 3' of <i>CLPTMIL</i> |
|                         | rs4530805   | 1306331   | 0.793 | 12kb 3' of <i>CLPTMIL</i> |
|                         | rs13355267  | 1312935   | 0.778 | 5kb 3' of <i>CLPTMIL</i>  |
|                         | rs13356727  | 1312457   | 0.778 | 5kb 3' of <i>CLPTMIL</i>  |
|                         | rs4975616   | 1315660   | 0.778 | 2kb 3' of <i>CLPTMIL</i>  |
|                         | rs6866294   | 1311693   | 0.774 | 6kb 3' of <i>CLPTMIL</i>  |
|                         | rs42269     | 1339985   | 0.744 | <i>CLPTMIL</i>            |
|                         | rs2735945   | 1303901   | 0.720 | 14kb 3' of <i>CLPTMIL</i> |
|                         | rs2736102   | 1302144   | 0.714 | 16kb 3' of <i>CLPTMIL</i> |
|                         | rs2853666   | 1302914   | 0.714 | 15kb 3' of <i>CLPTMIL</i> |
|                         | rs60622800  | 1309904   | 0.704 | <i>MIR4457</i>            |
|                         | rs6554758   | 1310152   | 0.704 | <i>MIR4457</i>            |
| rs36019446 (1339890)    |             |           |       |                           |
|                         | rs36019446  | 1339890   | 1.000 | <i>CLPTMIL</i>            |
| rs55901723 (1342154)    |             |           |       |                           |
|                         | rs55901723  | 1342154   | 1.000 | <i>CLPTMIL</i>            |
| rs37005 (1356450)       |             |           |       |                           |
|                         | rs37005     | 1356450   | 1.000 | 11kb 5' of <i>CLPTMIL</i> |
|                         | rs37003     | 1356771   | 0.979 | 12kb 5' of <i>CLPTMIL</i> |
|                         | rs37006     | 1355058   | 0.967 | 10kb 5' of <i>CLPTMIL</i> |
|                         | rs40181     | 1354462   | 0.963 | 9kb 5' of <i>CLPTMIL</i>  |
|                         | rs37009     | 1350339   | 0.932 | 5kb 5' of <i>CLPTMIL</i>  |
|                         | rs40182     | 1350397   | 0.932 | 5kb 5' of <i>CLPTMIL</i>  |
|                         | rs37008     | 1351538   | 0.931 | 6kb 5' of <i>CLPTMIL</i>  |
|                         | rs37010     | 1349535   | 0.925 | 4kb 5' of <i>CLPTMIL</i>  |
|                         | rs27069     | 1347128   | 0.922 | <i>CLPTMIL</i>            |
|                         | rs27996     | 1345474   | 0.916 | <i>CLPTMIL</i>            |
| rs37004 (1356684)       |             |           |       |                           |
|                         | rs37004     | 1356684   | 1.000 | 12kb 5' of <i>CLPTMIL</i> |
|                         | rs380145    | 1328897   | 0.893 | <i>CLPTMIL</i>            |
|                         | rs451360    | 1319680   | 0.887 | <i>CLPTMIL</i>            |
|                         | rs13170453  | 1317481   | 0.882 | <i>CLPTMIL</i>            |
|                         | rs27071     | 1346081   | 0.751 | <i>CLPTMIL</i>            |
|                         | rs27068     | 1347239   | 0.749 | 2kb 5' of <i>CLPTMIL</i>  |
| rs115960372 (1518494)   |             |           |       |                           |
|                         | rs115960372 | 1518494   | 1.000 | <i>LPCAT1</i>             |
| rs12655062 (1890988)    |             |           |       |                           |
|                         | rs12655062  | 1890877   | 1.000 | <i>CTD-2194D22.4</i>      |
|                         | rs4975759   | 1892455   | 0.748 | <i>CTD-2194D22.4</i>      |
|                         | rs34695572  | 1892876   | 0.746 | <i>CTD-2194D22.4</i>      |
| <hr/>                   |             |           |       |                           |
| <b>POT1</b>             |             |           |       |                           |
| rs74986217 (123465182)  |             |           |       |                           |
|                         | rs74986217  | 123465182 | 1.000 | 997kb 3' of <i>POT1</i>   |
| rs116895242 (123946403) |             |           |       |                           |
|                         | rs116895242 | 123946403 | 1.000 | 516kb 3' of <i>POT1</i>   |
| <hr/>                   |             |           |       |                           |
| <b>TERF2</b>            |             |           |       |                           |
| rs117496043 (69590365)  |             |           |       |                           |
|                         | rs117496043 | 69590365  | 1.000 | 170kb 5' of <i>TERF2</i>  |

***RTEL1***

|                        |             |          |       |                     |
|------------------------|-------------|----------|-------|---------------------|
| rs114220381 (61477960) |             |          |       |                     |
|                        | rs114220381 | 61477960 | 1.000 | <i>TCFL5</i>        |
| rs34978822 (62291599)  |             |          |       |                     |
|                        | rs34978822  | 62291599 | 1.000 | <i>RTEL1</i>        |
|                        | rs35640778  | 62321128 | 0.964 | <i>RTEL1</i>        |
|                        | rs34507260  | 62353508 | 0.880 | <i>ZGPAT</i>        |
|                        | rs34835912  | 62256843 | 0.794 | <i>LOC100505771</i> |

---
